# Supplementary material
Source: publisher figshare collection journal article supplement (https://acs.figshare.com/ndownloader/files/4516354)
Supplement: Supplementary file 1 [file 4516354]

data_general
_audit_creation_date                  '2009-03-12'
_audit_creation_method                'by CrystalStructure 3.8'
_audit_update_record                   ?

_publ_contact_author_name		'Kohtaro Osakada'
_publ_contact_author_email      	'kosakada@res.titech.ac.jp'
_publ_contact_author_fax   		'+81-45-924-5224'
_publ_contact_author_phone     		'+81-45-924-5223'
_publ_requested_journal   		'Organometallics'

loop_
_publ_author_name
'Makoto Tanabe, Masaya Hanzawa, Naoko Ishikawa,  and Kohtaro Osakada'

_publ_author_address
;
Chemcal Resources Laboratory, Tokyo Institute of Technology,
4259 Nagatsuta, Midori-ku, Yokohama 226-8503 JAPAN
;

_publ_section_title
;
Stepwise Ring Expansion of Germaplatinacycles 
;

#==============================================================================

data___complex1

#==============================================================================

# CHEMICAL DATA

_chemical_formula_sum                  'C34 H43 Ge2 P2 Pt '
_chemical_formula_moiety               'C34 H43 Ge2 P2 Pt '
_chemical_formula_weight               853.93
_chemical_melting_point                ?

#==============================================================================

# CRYSTAL DATA
_symmetry_cell_setting                 monoclinic
_symmetry_space_group_name_H-M        'P 1 21/c 1'
_symmetry_space_group_name_Hall       '-P 2ybc'
_symmetry_Int_Tables_number            14
loop_
_symmetry_equiv_pos_site_id
_symmetry_equiv_pos_as_xyz
1   '+X,+Y,+Z'
2   '-X,1/2+Y,1/2-Z'
3   '-X,-Y,-Z'
4   '+X,1/2-Y,1/2+Z'

#------------------------------------------------------------------------------

_cell_length_a                         17.672(4)
_cell_length_b                         11.870(2)
_cell_length_c                         17.501(3)
_cell_angle_alpha                      90.0000
_cell_angle_beta                       118.373(3)
_cell_angle_gamma                      90.0000
_cell_volume                           3230.0(11)
_cell_formula_units_Z                  4
_cell_measurement_reflns_used          9944
_cell_measurement_theta_min            3.1
_cell_measurement_theta_max            27.5
_cell_measurement_temperature          113.1

#------------------------------------------------------------------------------

_exptl_crystal_description            'prism'
_exptl_crystal_colour                 'colorless'
_exptl_crystal_size_max                0.17
_exptl_crystal_size_mid                0.15
_exptl_crystal_size_min                0.08
_exptl_crystal_density_diffrn          1.740
_exptl_crystal_density_meas            ?
_exptl_crystal_density_method         'not measured'
_exptl_crystal_F_000                   1676.00
_exptl_absorpt_coefficient_mu          6.272
_exptl_absorpt_correction_type         multi-scan
_exptl_absorpt_process_details         
'Jacobson, R. (1998) Private communication'
_exptl_absorpt_correction_T_min        0.301
_exptl_absorpt_correction_T_max        0.605

#==============================================================================

# EXPERIMENTAL DATA

_diffrn_radiation_type                'Mo K\a'
_diffrn_radiation_wavelength           0.71070
_diffrn_measurement_device_type       'Rigaku Saturn'
_diffrn_measurement_method             \w
_diffrn_detector_area_resol_mean       7.31
_diffrn_reflns_number                  22578
_diffrn_reflns_av_R_equivalents        0.032
_diffrn_reflns_theta_max               27.48
_diffrn_measured_fraction_theta_max    0.954
_diffrn_reflns_theta_full              27.48
_diffrn_measured_fraction_theta_full   0.954
_diffrn_reflns_limit_h_min             -16
_diffrn_reflns_limit_h_max             22
_diffrn_reflns_limit_k_min             -15
_diffrn_reflns_limit_k_max             15
_diffrn_reflns_limit_l_min             -22
_diffrn_reflns_limit_l_max             16

#==============================================================================

# REFINEMENT DATA

_refine_special_details
;
    Refinement was performed using all reflections. The weighted 
    R-factor (wR) and goodness of fit (S) are based on F^2^.
    R-factor (gt) are based on F. The threshold expression of
    F^2^ > 2.0 sigma(F^2^) is used only for calculating R-factor (gt).
;
_reflns_number_total                   7072
_reflns_number_gt                      6404
_reflns_threshold_expression           F^2^>2.0\s(F^2^)
_refine_ls_structure_factor_coef       Fsqd
_refine_ls_R_factor_gt                 0.0351
_refine_ls_R_factor_all                0.0386 
_refine_ls_wR_factor_gt                0.0938 
_refine_ls_wR_factor_ref               0.0963
_refine_ls_hydrogen_treatment          mixed
_refine_ls_number_reflns               7072
_refine_ls_number_parameters           361
_refine_ls_goodness_of_fit_ref         1.044
_refine_ls_weighting_scheme            calc
_refine_ls_weighting_details
   'w = 1/[\s^2^(Fo^2^)+(0.0535P)^2^+7.1087P] where P=(Fo^2^+2Fc^2^)/3'
_refine_ls_shift/su_max                8.6130
_refine_diff_density_max               4.05
_refine_diff_density_min               -2.45
_refine_ls_extinction_method           none
_refine_ls_extinction_coef             ?

loop_
_atom_type_symbol
_atom_type_description
_atom_type_scat_dispersion_real
_atom_type_scat_dispersion_imag
_atom_type_scat_source
  'C' 'C'  0.003 0.002 
;
International Tables for Crystallography
(1992, Vol. C, Tables 4.2.6.8 and 6.1.1.4)
;
  'H' 'H'  0.000 0.000 
;
International Tables for Crystallography
(1992, Vol. C, Table 6.1.1.4)
;
  'Pt' 'Pt'  -1.703 8.390 
;
International Tables for Crystallography
(1992, Vol. C, Tables 4.2.6.8 and 6.1.1.4)
;
  'Ge' 'Ge'  0.155 1.800 
;
International Tables for Crystallography
(1992, Vol. C, Tables 4.2.6.8 and 6.1.1.4)
;
  'P' 'P'  0.102 0.094 
;
International Tables for Crystallography
(1992, Vol. C, Tables 4.2.6.8 and 6.1.1.4)
;

#==============================================================================

# ATOMIC COORDINATES AND THERMAL PARAMETERS

loop_
_atom_site_label
_atom_site_type_symbol
_atom_site_fract_x
_atom_site_fract_y
_atom_site_fract_z
_atom_site_U_iso_or_equiv
_atom_site_adp_type
_atom_site_occupancy
_atom_site_symmetry_multiplicity
_atom_site_calc_flag
_atom_site_refinement_flags
_atom_site_disorder_assembly
_atom_site_disorder_group
 Pt1 Pt 0.236394(10) 0.641052(13) 0.360913(11) 0.01525(6) Uani 1.00 1 d . . .
 Ge1 Ge 0.14579(3) 0.74533(4) 0.22711(3) 0.01665(11) Uani 1.00 1 d . . .
 Ge2 Ge 0.29656(3) 0.52970(4) 0.28541(3) 0.01578(11) Uani 1.00 1 d . . .
 P1 P 0.32711(8) 0.55630(10) 0.49027(8) 0.0216(2) Uani 1.00 1 d . . .
 P2 P 0.18452(8) 0.73703(10) 0.44012(8) 0.0196(2) Uani 1.00 1 d . . .
 C1 C 0.0256(2) 0.7593(3) 0.2063(2) 0.0171(8) Uani 1.00 1 d . . .
 C2 C -0.0194(3) 0.8613(3) 0.1876(3) 0.0210(9) Uani 1.00 1 d . . .
 C3 C -0.1036(3) 0.8664(3) 0.1749(3) 0.0256(10) Uani 1.00 1 d . . .
 C4 C -0.1442(3) 0.7701(4) 0.1807(3) 0.0247(9) Uani 1.00 1 d . . .
 C5 C -0.1009(3) 0.6675(4) 0.1991(3) 0.0238(9) Uani 1.00 1 d . . .
 C6 C -0.0176(3) 0.6632(3) 0.2110(3) 0.0199(9) Uani 1.00 1 d . . .
 C7 C 0.1818(3) 0.9006(3) 0.2177(3) 0.0232(9) Uani 1.00 1 d . . .
 C8 C 0.1338(3) 0.9629(4) 0.1427(3) 0.0279(10) Uani 1.00 1 d . . .
 C9 C 0.1585(4) 1.0721(4) 0.1328(4) 0.0372(13) Uani 1.00 1 d . . .
 C10 C 0.2324(4) 1.1182(4) 0.1978(4) 0.0398(14) Uani 1.00 1 d . . .
 C11 C 0.2814(3) 1.0584(4) 0.2731(4) 0.0367(13) Uani 1.00 1 d . . .
 C12 C 0.2562(3) 0.9497(4) 0.2828(3) 0.0268(10) Uani 1.00 1 d . . .
 C13 C 0.2174(3) 0.4603(3) 0.1718(2) 0.0201(9) Uani 1.00 1 d . . .
 C14 C 0.1302(3) 0.4522(4) 0.1452(3) 0.0285(10) Uani 1.00 1 d . . .
 C15 C 0.0759(4) 0.3953(5) 0.0694(3) 0.0416(14) Uani 1.00 1 d . . .
 C16 C 0.1073(4) 0.3471(4) 0.0185(3) 0.0450(17) Uani 1.00 1 d . . .
 C17 C 0.1933(5) 0.3554(4) 0.0434(3) 0.0419(16) Uani 1.00 1 d . . .
 C18 C 0.2479(3) 0.4115(4) 0.1197(3) 0.0317(11) Uani 1.00 1 d . . .
 C19 C 0.3888(2) 0.6088(3) 0.2726(2) 0.0182(8) Uani 1.00 1 d . . .
 C20 C 0.4020(3) 0.7232(4) 0.2881(3) 0.0254(10) Uani 1.00 1 d . . .
 C21 C 0.4668(3) 0.7795(4) 0.2808(3) 0.0315(11) Uani 1.00 1 d . . .
 C22 C 0.5204(3) 0.7219(4) 0.2569(3) 0.0284(10) Uani 1.00 1 d . . .
 C23 C 0.5093(3) 0.6077(4) 0.2422(4) 0.0365(13) Uani 1.00 1 d . . .
 C24 C 0.4450(3) 0.5518(4) 0.2513(3) 0.0326(12) Uani 1.00 1 d . . .
 C25 C 0.3351(3) 0.4047(4) 0.5042(3) 0.0332(11) Uani 1.00 1 d . . .
 C26 C 0.4377(3) 0.6017(4) 0.5307(3) 0.0314(11) Uani 1.00 1 d . . .
 C27 C 0.0895(3) 0.6742(4) 0.4372(3) 0.0260(10) Uani 1.00 1 d . . .
 C28 C 0.1584(3) 0.8845(4) 0.4260(3) 0.0290(11) Uani 1.00 1 d . . .
 C29 C 0.2997(3) 0.6047(5) 0.5743(3) 0.0318(11) Uani 1.00 1 d . . .
 C30 C 0.2656(3) 0.7244(4) 0.5554(3) 0.0297(11) Uani 1.00 1 d . . .
 C31 C 0.3701(8) 0.4223(12) 0.0152(9) 0.047(3) Uani 0.50 1 d P . .
 C32 C 0.4433(9) 0.5724(9) 0.0041(6) 0.111(4) Uani 1.00 1 d . . .
 C33 C 0.4310(7) 0.4622(8) 0.0090(5) 0.093(3) Uani 1.00 1 d . . .
 C34 C 0.4885(10) 0.3840(10) 0.0071(8) 0.125(6) Uani 1.00 1 d . . .
 H1 H 0.135(2) 0.702(3) 0.137(2) 0.000(9) Uiso 1.00 1 c . . .
 H2 H 0.351(2) 0.395(3) 0.339(2) 0.000(9) Uiso 1.00 1 c . . .
 H3 H 0.0078 0.9284 0.1835 0.025 Uiso 1.00 1 c R . .
 H4 H -0.1331 0.9365 0.1621 0.031 Uiso 1.00 1 c R . .
 H5 H -0.2014 0.7738 0.1723 0.030 Uiso 1.00 1 c R . .
 H6 H -0.1283 0.6008 0.2035 0.029 Uiso 1.00 1 c R . .
 H7 H 0.0111 0.5926 0.2228 0.024 Uiso 1.00 1 c R . .
 H8 H 0.0831 0.9310 0.0972 0.033 Uiso 1.00 1 c R . .
 H9 H 0.1243 1.1138 0.0814 0.045 Uiso 1.00 1 c R . .
 H10 H 0.2498 1.1916 0.1909 0.048 Uiso 1.00 1 c R . .
 H11 H 0.3321 1.0908 0.3182 0.044 Uiso 1.00 1 c R . .
 H12 H 0.2904 0.9088 0.3346 0.032 Uiso 1.00 1 c R . .
 H13 H 0.1074 0.4859 0.1792 0.034 Uiso 1.00 1 c R . .
 H14 H 0.0164 0.3897 0.0523 0.050 Uiso 1.00 1 c R . .
 H15 H 0.0697 0.3084 -0.0333 0.054 Uiso 1.00 1 c R . .
 H16 H 0.2155 0.3229 0.0085 0.050 Uiso 1.00 1 c R . .
 H17 H 0.3075 0.4165 0.1366 0.038 Uiso 1.00 1 c R . .
 H18 H 0.3656 0.7642 0.3042 0.031 Uiso 1.00 1 c R . .
 H19 H 0.4746 0.8581 0.2922 0.038 Uiso 1.00 1 c R . .
 H20 H 0.5643 0.7606 0.2508 0.034 Uiso 1.00 1 c R . .
 H21 H 0.5456 0.5671 0.2258 0.044 Uiso 1.00 1 c R . .
 H22 H 0.4393 0.4726 0.2427 0.039 Uiso 1.00 1 c R . .
 H23 H 0.2935 0.3788 0.5225 0.040 Uiso 1.00 1 c R . .
 H24 H 0.3933 0.3846 0.5485 0.040 Uiso 1.00 1 c R . .
 H25 H 0.3226 0.3687 0.4490 0.040 Uiso 1.00 1 c R . .
 H26 H 0.4666 0.5516 0.5082 0.038 Uiso 1.00 1 c R . .
 H27 H 0.4676 0.5989 0.5943 0.038 Uiso 1.00 1 c R . .
 H28 H 0.4385 0.6790 0.5115 0.038 Uiso 1.00 1 c R . .
 H29 H 0.0379 0.7057 0.3884 0.031 Uiso 1.00 1 c R . .
 H30 H 0.0886 0.6905 0.4917 0.031 Uiso 1.00 1 c R . .
 H31 H 0.0907 0.5925 0.4300 0.031 Uiso 1.00 1 c R . .
 H32 H 0.2092 0.9285 0.4648 0.035 Uiso 1.00 1 c R . .
 H33 H 0.1118 0.8995 0.4400 0.035 Uiso 1.00 1 c R . .
 H34 H 0.1400 0.9060 0.3657 0.035 Uiso 1.00 1 c R . .
 H35 H 0.2556 0.5543 0.5755 0.038 Uiso 1.00 1 c R . .
 H36 H 0.3514 0.6016 0.6320 0.038 Uiso 1.00 1 c R . .
 H37 H 0.3135 0.7774 0.5686 0.036 Uiso 1.00 1 c R . .
 H38 H 0.2393 0.7440 0.5926 0.036 Uiso 1.00 1 c R . .
 H39 H 0.3856 0.4145 0.0766 0.056 Uiso 0.50 1 c R . .
 H40 H 0.3557 0.3481 -0.0127 0.056 Uiso 0.50 1 c R . .
 H41 H 0.3203 0.4724 -0.0134 0.056 Uiso 0.50 1 c R . .
 H42 H 0.4042 0.6238 0.0084 0.133 Uiso 1.00 1 c R . .
 H43 H 0.4822 0.3055 0.0131 0.150 Uiso 1.00 1 c R . .


loop_
_atom_site_aniso_label
_atom_site_aniso_U_11
_atom_site_aniso_U_22
_atom_site_aniso_U_33
_atom_site_aniso_U_12
_atom_site_aniso_U_13
_atom_site_aniso_U_23
 Pt1 0.01788(11) 0.01313(10) 0.01914(12) -0.00034(5) 0.01239(9) -0.00069(5)
 Ge1 0.0230(2) 0.0118(2) 0.0218(2) 0.00189(17) 0.0160(2) 0.00231(16)
 Ge2 0.0181(2) 0.0136(2) 0.0186(2) 0.00044(16) 0.0111(2) -0.00045(16)
 P1 0.0240(6) 0.0191(5) 0.0212(6) 0.0007(4) 0.0103(5) -0.0000(4)
 P2 0.0228(6) 0.0196(5) 0.0219(6) -0.0007(4) 0.0151(5) -0.0037(4)
 C1 0.020(2) 0.020(2) 0.013(2) -0.0004(16) 0.0094(18) -0.0017(15)
 C2 0.026(2) 0.014(2) 0.025(2) 0.0004(16) 0.014(2) -0.0005(15)
 C3 0.028(2) 0.021(2) 0.029(2) 0.0061(18) 0.014(2) 0.0007(18)
 C4 0.023(2) 0.027(2) 0.026(2) 0.0004(18) 0.014(2) -0.0013(19)
 C5 0.030(2) 0.020(2) 0.027(2) -0.0018(18) 0.017(2) 0.0007(18)
 C6 0.028(2) 0.0163(19) 0.021(2) 0.0048(17) 0.017(2) 0.0052(17)
 C7 0.031(2) 0.015(2) 0.038(2) 0.0041(17) 0.028(2) 0.0022(18)
 C8 0.043(3) 0.018(2) 0.038(2) 0.0030(19) 0.031(2) 0.0042(19)
 C9 0.065(4) 0.019(2) 0.052(3) 0.009(2) 0.047(3) 0.012(2)
 C10 0.062(4) 0.016(2) 0.071(4) -0.003(2) 0.055(3) 0.001(2)
 C11 0.041(3) 0.023(2) 0.065(4) -0.011(2) 0.041(3) -0.012(2)
 C12 0.030(2) 0.020(2) 0.043(3) 0.0028(18) 0.027(2) 0.001(2)
 C13 0.027(2) 0.0144(19) 0.019(2) 0.0012(16) 0.010(2) 0.0005(16)
 C14 0.027(2) 0.025(2) 0.029(2) -0.0078(19) 0.010(2) 0.0006(19)
 C15 0.043(3) 0.037(3) 0.032(3) -0.017(2) 0.008(2) 0.007(2)
 C16 0.068(4) 0.023(2) 0.020(3) -0.017(2) 0.002(3) 0.003(2)
 C17 0.072(4) 0.022(2) 0.022(3) 0.009(2) 0.014(3) -0.0025(19)
 C18 0.035(2) 0.031(2) 0.025(2) 0.010(2) 0.010(2) -0.004(2)
 C19 0.018(2) 0.019(2) 0.020(2) 0.0008(17) 0.0118(19) 0.0025(17)
 C20 0.025(2) 0.022(2) 0.036(2) -0.0004(18) 0.020(2) -0.0019(19)
 C21 0.031(2) 0.019(2) 0.048(3) -0.0067(19) 0.022(2) -0.005(2)
 C22 0.025(2) 0.031(2) 0.034(2) -0.007(2) 0.019(2) 0.000(2)
 C23 0.035(3) 0.033(2) 0.060(3) -0.006(2) 0.037(3) -0.009(2)
 C24 0.033(2) 0.021(2) 0.058(3) -0.005(2) 0.033(2) -0.010(2)
 C25 0.047(3) 0.023(2) 0.025(2) 0.002(2) 0.013(2) 0.007(2)
 C26 0.023(2) 0.031(2) 0.036(3) 0.001(2) 0.011(2) -0.004(2)
 C27 0.027(2) 0.034(2) 0.023(2) -0.006(2) 0.016(2) -0.007(2)
 C28 0.034(2) 0.020(2) 0.040(3) -0.001(2) 0.024(2) -0.007(2)
 C29 0.034(2) 0.047(3) 0.018(2) 0.004(2) 0.015(2) 0.002(2)
 C30 0.028(2) 0.038(2) 0.027(2) -0.000(2) 0.016(2) -0.011(2)
 C31 0.038(6) 0.048(7) 0.053(8) -0.001(5) 0.021(6) -0.004(6)
 C32 0.131(10) 0.072(7) 0.071(6) 0.026(7) -0.000(7) -0.031(5)
 C33 0.112(8) 0.062(5) 0.041(4) 0.027(5) -0.015(5) -0.009(3)
 C34 0.129(11) 0.055(6) 0.101(9) 0.029(6) -0.018(8) -0.019(6)

#==============================================================================

_computing_data_collection            'CrystalClear'
_computing_cell_refinement            'CrystalClear'
_computing_data_reduction             'CrystalStructure'
_computing_structure_solution         'SHELXS97'
_computing_structure_refinement       'SHELXL'
_computing_publication_material       'CrystalStructure 3.8'
_computing_molecular_graphics          ?

#==============================================================================

# MOLECULAR GEOMETRY

_geom_special_details
;
    ENTER SPECIAL DETAILS OF THE MOLECULAR GEOMETRY
;

loop_
_geom_bond_atom_site_label_1
_geom_bond_atom_site_label_2
_geom_bond_distance
_geom_bond_publ_flag
_geom_bond_site_symmetry_1
_geom_bond_site_symmetry_2
Pt1 Ge1 2.4527(4) yes . .
Pt1 Ge2 2.4411(6) yes . .
Pt1 P1 2.2930(11) yes . .
Pt1 P2 2.2951(16) yes . .
Ge1 C1 1.983(5) yes . .
Ge1 C7 1.982(4) yes . .
Ge2 C13 1.986(4) yes . .
Ge2 C19 1.985(5) yes . .
P1 C25 1.812(5) yes . .
P1 C26 1.815(5) yes . .
P1 C29 1.845(7) yes . .
P2 C27 1.816(6) yes . .
P2 C28 1.797(5) yes . .
P2 C30 1.843(4) yes . .
C1 C2 1.400(6) yes . .
C1 C6 1.397(6) yes . .
C2 C3 1.397(8) yes . .
C3 C4 1.378(7) yes . .
C4 C5 1.392(6) yes . .
C5 C6 1.387(8) yes . .
C7 C8 1.388(6) yes . .
C7 C12 1.394(6) yes . .
C8 C9 1.405(7) yes . .
C9 C10 1.374(7) yes . .
C10 C11 1.381(8) yes . .
C11 C12 1.400(7) yes . .
C13 C14 1.385(7) yes . .
C13 C18 1.387(9) yes . .
C14 C15 1.389(7) yes . .
C15 C16 1.377(11) yes . .
C16 C17 1.372(12) yes . .
C17 C18 1.391(7) yes . .
C19 C20 1.383(6) yes . .
C19 C24 1.391(8) yes . .
C20 C21 1.385(9) yes . .
C21 C22 1.383(9) yes . .
C22 C23 1.376(7) yes . .
C23 C24 1.388(9) yes . .
C29 C30 1.518(8) yes . .
C31 C33 1.23(2) yes . .
C32 C33 1.335(15) yes . .
C32 C34 1.41(2) yes . 3_665
C33 C34 1.39(2) yes . .
Ge1 H1 1.57(4) no . .
Ge2 H2 1.87(3) no . .
C2 H3 0.950 no . .
C3 H4 0.950 no . .
C4 H5 0.950 no . .
C5 H6 0.950 no . .
C6 H7 0.950 no . .
C8 H8 0.950 no . .
C9 H9 0.950 no . .
C10 H10 0.950 no . .
C11 H11 0.950 no . .
C12 H12 0.950 no . .
C14 H13 0.950 no . .
C15 H14 0.950 no . .
C16 H15 0.950 no . .
C17 H16 0.950 no . .
C18 H17 0.950 no . .
C20 H18 0.950 no . .
C21 H19 0.950 no . .
C22 H20 0.950 no . .
C23 H21 0.950 no . .
C24 H22 0.950 no . .
C25 H23 0.980 no . .
C25 H24 0.980 no . .
C25 H25 0.980 no . .
C26 H26 0.980 no . .
C26 H27 0.980 no . .
C26 H28 0.980 no . .
C27 H29 0.980 no . .
C27 H30 0.980 no . .
C27 H31 0.980 no . .
C28 H32 0.980 no . .
C28 H33 0.980 no . .
C28 H34 0.980 no . .
C29 H35 0.990 no . .
C29 H36 0.990 no . .
C30 H37 0.990 no . .
C30 H38 0.990 no . .
C31 H39 0.980 no . .
C31 H40 0.980 no . .
C31 H41 0.980 no . .
C32 H42 0.950 no . .
C34 H43 0.950 no . .

loop_
_geom_angle_atom_site_label_1
_geom_angle_atom_site_label_2
_geom_angle_atom_site_label_3
_geom_angle
_geom_angle_publ_flag
_geom_angle_site_symmetry_1
_geom_angle_site_symmetry_2
_geom_angle_site_symmetry_3
Ge1 Pt1 Ge2 90.634(18) yes . . .
Ge1 Pt1 P1 175.52(3) yes . . .
Ge1 Pt1 P2 93.40(3) yes . . .
Ge2 Pt1 P1 90.97(4) yes . . .
Ge2 Pt1 P2 175.90(3) yes . . .
P1 Pt1 P2 85.06(4) yes . . .
Pt1 Ge1 C1 111.94(13) yes . . .
Pt1 Ge1 C7 117.34(12) yes . . .
C1 Ge1 C7 105.3(2) yes . . .
Pt1 Ge2 C13 119.07(16) yes . . .
Pt1 Ge2 C19 113.43(14) yes . . .
C13 Ge2 C19 108.0(2) yes . . .
Pt1 P1 C25 122.78(16) yes . . .
Pt1 P1 C26 111.89(19) yes . . .
Pt1 P1 C29 108.98(16) yes . . .
C25 P1 C26 104.0(2) yes . . .
C25 P1 C29 103.6(3) yes . . .
C26 P1 C29 103.8(2) yes . . .
Pt1 P2 C27 114.12(19) yes . . .
Pt1 P2 C28 123.4(2) yes . . .
Pt1 P2 C30 107.2(2) yes . . .
C27 P2 C28 102.9(2) yes . . .
C27 P2 C30 103.0(2) yes . . .
C28 P2 C30 104.2(2) yes . . .
Ge1 C1 C2 123.8(3) yes . . .
Ge1 C1 C6 119.2(3) yes . . .
C2 C1 C6 117.0(4) yes . . .
C1 C2 C3 121.3(4) yes . . .
C2 C3 C4 120.3(4) yes . . .
C3 C4 C5 119.6(5) yes . . .
C4 C5 C6 119.7(4) yes . . .
C1 C6 C5 122.1(4) yes . . .
Ge1 C7 C8 119.8(3) yes . . .
Ge1 C7 C12 122.4(3) yes . . .
C8 C7 C12 117.7(4) yes . . .
C7 C8 C9 121.5(4) yes . . .
C8 C9 C10 119.6(4) yes . . .
C9 C10 C11 120.2(5) yes . . .
C10 C11 C12 119.9(4) yes . . .
C7 C12 C11 121.1(4) yes . . .
Ge2 C13 C14 120.4(4) yes . . .
Ge2 C13 C18 121.5(3) yes . . .
C14 C13 C18 117.9(4) yes . . .
C13 C14 C15 120.5(6) yes . . .
C14 C15 C16 120.8(6) yes . . .
C15 C16 C17 119.4(5) yes . . .
C16 C17 C18 119.9(7) yes . . .
C13 C18 C17 121.4(6) yes . . .
Ge2 C19 C20 120.8(4) yes . . .
Ge2 C19 C24 122.0(3) yes . . .
C20 C19 C24 117.1(5) yes . . .
C19 C20 C21 121.7(5) yes . . .
C20 C21 C22 120.3(4) yes . . .
C21 C22 C23 119.1(6) yes . . .
C22 C23 C24 120.1(6) yes . . .
C19 C24 C23 121.7(4) yes . . .
P1 C29 C30 110.2(4) yes . . .
P2 C30 C29 109.7(3) yes . . .
C33 C32 C34 123.0(14) yes . . 3_665
C31 C33 C32 124.1(14) yes . . .
C31 C33 C34 115.2(12) yes . . .
C32 C33 C34 120.7(14) yes . . .
C32 C34 C33 116.2(11) yes 3_665 . .
Pt1 Ge1 H1 120.4(14) no . . .
C1 Ge1 H1 103.2(15) no . . .
C7 Ge1 H1 96.3(16) no . . .
Pt1 Ge2 H2 116.4(15) no . . .
C13 Ge2 H2 95.5(11) no . . .
C19 Ge2 H2 101.9(15) no . . .
C1 C2 H3 119.3 no . . .
C3 C2 H3 119.4 no . . .
C2 C3 H4 119.9 no . . .
C4 C3 H4 119.9 no . . .
C3 C4 H5 120.2 no . . .
C5 C4 H5 120.2 no . . .
C4 C5 H6 120.2 no . . .
C6 C5 H6 120.2 no . . .
C1 C6 H7 118.9 no . . .
C5 C6 H7 118.9 no . . .
C7 C8 H8 119.3 no . . .
C9 C8 H8 119.3 no . . .
C8 C9 H9 120.2 no . . .
C10 C9 H9 120.2 no . . .
C9 C10 H10 119.9 no . . .
C11 C10 H10 119.9 no . . .
C10 C11 H11 120.0 no . . .
C12 C11 H11 120.1 no . . .
C7 C12 H12 119.4 no . . .
C11 C12 H12 119.4 no . . .
C13 C14 H13 119.7 no . . .
C15 C14 H13 119.7 no . . .
C14 C15 H14 119.6 no . . .
C16 C15 H14 119.6 no . . .
C15 C16 H15 120.3 no . . .
C17 C16 H15 120.3 no . . .
C16 C17 H16 120.0 no . . .
C18 C17 H16 120.1 no . . .
C13 C18 H17 119.3 no . . .
C17 C18 H17 119.3 no . . .
C19 C20 H18 119.2 no . . .
C21 C20 H18 119.2 no . . .
C20 C21 H19 119.9 no . . .
C22 C21 H19 119.9 no . . .
C21 C22 H20 120.4 no . . .
C23 C22 H20 120.4 no . . .
C22 C23 H21 120.0 no . . .
C24 C23 H21 120.0 no . . .
C19 C24 H22 119.2 no . . .
C23 C24 H22 119.1 no . . .
P1 C25 H23 109.5 no . . .
P1 C25 H24 109.5 no . . .
P1 C25 H25 109.5 no . . .
H23 C25 H24 109.5 no . . .
H23 C25 H25 109.5 no . . .
H24 C25 H25 109.5 no . . .
P1 C26 H26 109.5 no . . .
P1 C26 H27 109.5 no . . .
P1 C26 H28 109.5 no . . .
H26 C26 H27 109.5 no . . .
H26 C26 H28 109.5 no . . .
H27 C26 H28 109.5 no . . .
P2 C27 H29 109.5 no . . .
P2 C27 H30 109.5 no . . .
P2 C27 H31 109.5 no . . .
H29 C27 H30 109.5 no . . .
H29 C27 H31 109.5 no . . .
H30 C27 H31 109.5 no . . .
P2 C28 H32 109.5 no . . .
P2 C28 H33 109.5 no . . .
P2 C28 H34 109.5 no . . .
H32 C28 H33 109.5 no . . .
H32 C28 H34 109.5 no . . .
H33 C28 H34 109.5 no . . .
P1 C29 H35 109.6 no . . .
P1 C29 H36 109.6 no . . .
C30 C29 H35 109.6 no . . .
C30 C29 H36 109.6 no . . .
H35 C29 H36 108.2 no . . .
P2 C30 H37 109.7 no . . .
P2 C30 H38 109.7 no . . .
C29 C30 H37 109.7 no . . .
C29 C30 H38 109.7 no . . .
H37 C30 H38 108.2 no . . .
C33 C31 H39 109.5 no . . .
C33 C31 H40 109.5 no . . .
C33 C31 H41 109.5 no . . .
H39 C31 H40 109.5 no . . .
H39 C31 H41 109.5 no . . .
H40 C31 H41 109.5 no . . .
C33 C32 H42 118.5 no . . .
C34 C32 H42 118.5 no 3_665 . .
C32 C34 H43 121.9 no 3_665 . .
C33 C34 H43 121.9 no . . .


#==============================================================================

data__complex2

#==============================================================================

# CHEMICAL DATA

_chemical_formula_sum                  'C42 H46 Ge3 P2 Pt '
_chemical_formula_moiety               'C42 H46 Ge3 P2 Pt '
_chemical_formula_weight               1025.63
_chemical_melting_point                ?

#==============================================================================

# CRYSTAL DATA
_symmetry_cell_setting                 monoclinic
_symmetry_space_group_name_H-M        'P 1 21/n 1'
_symmetry_space_group_name_Hall       '-P 2yn'
_symmetry_Int_Tables_number            14
loop_
_symmetry_equiv_pos_site_id
_symmetry_equiv_pos_as_xyz
1   '+X,+Y,+Z'
2   '1/2-X,1/2+Y,1/2-Z'
3   '-X,-Y,-Z'
4   '1/2+X,1/2-Y,1/2+Z'

#------------------------------------------------------------------------------

_cell_length_a                         17.783(7)
_cell_length_b                         15.928(8)
_cell_length_c                         15.164(5)
_cell_angle_alpha                      90.0000
_cell_angle_beta                       102.04(3)
_cell_angle_gamma                      90.0000
_cell_volume                           4201(3)
_cell_formula_units_Z                  4
_cell_measurement_reflns_used          24
_cell_measurement_theta_min            15.0
_cell_measurement_theta_max            17.2
_cell_measurement_temperature          298.1

#------------------------------------------------------------------------------

_exptl_crystal_description            'prismatic'
_exptl_crystal_colour                 'yellow'
_exptl_crystal_size_max                0.53
_exptl_crystal_size_mid                0.36
_exptl_crystal_size_min                0.35
_exptl_crystal_density_diffrn          1.622
_exptl_crystal_density_meas            1.500
_exptl_crystal_density_method          ?
_exptl_crystal_F_000                   2008.00
_exptl_absorpt_coefficient_mu          5.534
_exptl_absorpt_correction_type         psi-scan
_exptl_absorpt_process_details         '(North, Phillips & Mathews, 1968)'
_exptl_absorpt_correction_T_min        0.117
_exptl_absorpt_correction_T_max        0.144

#==============================================================================

# EXPERIMENTAL DATA

_diffrn_radiation_type                'Mo K\a'
_diffrn_radiation_wavelength           0.71069
_diffrn_measurement_device_type       'Rigaku AFC7R'
_diffrn_measurement_method             \w-2\q
_diffrn_reflns_number                  11456
_diffrn_reflns_av_R_equivalents        0.051
_diffrn_reflns_theta_max               27.48
_diffrn_measured_fraction_theta_max    0.999
_diffrn_reflns_theta_full              27.48
_diffrn_measured_fraction_theta_full   0.999
_diffrn_reflns_limit_h_min             -12
_diffrn_reflns_limit_h_max             23
_diffrn_reflns_limit_k_min             0
_diffrn_reflns_limit_k_max             20
_diffrn_reflns_limit_l_min             -19
_diffrn_reflns_limit_l_max             19

_diffrn_standards_number               3
_diffrn_standards_interval_count       0
_diffrn_standards_decay_%              0.00

#==============================================================================

# REFINEMENT DATA

_refine_special_details
;
    Refinement was performed using all reflections. The weighted 
    R-factor (wR) and goodness of fit (S) are based on F^2^.
    R-factor (gt) are based on F. The threshold expression of
    F^2^ > 2.0 sigma(F^2^) is used only for calculating R-factor (gt).
;
_reflns_number_total                   9618
_reflns_number_gt                      5059
_reflns_threshold_expression           F^2^>2.0\s(F^2^)
_refine_ls_structure_factor_coef       Fsqd
_refine_ls_R_factor_gt                 0.0443
_refine_ls_R_factor_all                0.1378 
_refine_ls_wR_factor_ref               0.1416
_refine_ls_wR_factor_gt                0.1097 
_refine_ls_hydrogen_treatment          refall
_refine_ls_number_reflns               9618
_refine_ls_number_parameters           434
_refine_ls_goodness_of_fit_ref         1.009
_refine_ls_weighting_scheme            calc
_refine_ls_weighting_details
   'w = 1/[\s^2^(Fo^2^)+(0.0578P)^2^+3.5951P] where P=(Fo^2^+2Fc^2^)/3'
_refine_ls_shift/su_max                0.0010
_refine_diff_density_max               1.53
_refine_diff_density_min               -1.39
_refine_ls_extinction_method           none
_refine_ls_extinction_coef             ?

loop_
_atom_type_symbol
_atom_type_description
_atom_type_scat_dispersion_real
_atom_type_scat_dispersion_imag
_atom_type_scat_source
  'Ge' 'Ge'  0.155 1.800 
;
International Tables for Crystallography
(1992, Vol. C, Tables 4.2.6.8 and 6.1.1.4)
;
  'P' 'P'  0.102 0.094 
;
International Tables for Crystallography
(1992, Vol. C, Tables 4.2.6.8 and 6.1.1.4)
;
  'C' 'C'  0.003 0.002 
;
International Tables for Crystallography
(1992, Vol. C, Tables 4.2.6.8 and 6.1.1.4)
;
  'H' 'H'  0.000 0.000 
;
International Tables for Crystallography
(1992, Vol. C, Table 6.1.1.4)
;
  'Pt' 'Pt'  -1.703 8.390 
;
International Tables for Crystallography
(1992, Vol. C, Tables 4.2.6.8 and 6.1.1.4)
;

#==============================================================================

# ATOMIC COORDINATES AND THERMAL PARAMETERS

loop_
_atom_site_label
_atom_site_type_symbol
_atom_site_fract_x
_atom_site_fract_y
_atom_site_fract_z
_atom_site_U_iso_or_equiv
_atom_site_adp_type
_atom_site_occupancy
_atom_site_symmetry_multiplicity
_atom_site_calc_flag
_atom_site_refinement_flags
_atom_site_disorder_assembly
_atom_site_disorder_group
 Pt1 Pt 0.220524(19) 0.858841(19) 0.93412(2) 0.04101(10) Uani 1.00 1 d . . .
 Ge1 Ge 0.25332(5) 0.73108(6) 0.86025(6) 0.0484(2) Uani 1.00 1 d . . .
 Ge2 Ge 0.15268(5) 0.63563(5) 0.91000(6) 0.0436(2) Uani 1.00 1 d . . .
 Ge3 Ge 0.11683(5) 0.77069(5) 0.96772(6) 0.0402(2) Uani 1.00 1 d . . .
 P1 P 0.19458(15) 0.97283(15) 1.01392(17) 0.0537(6) Uani 1.00 1 d . . .
 P2 P 0.30999(19) 0.94174(18) 0.8893(2) 0.0747(8) Uani 1.00 1 d . . .
 C1 C 0.3557(4) 0.6893(5) 0.9163(6) 0.052(2) Uani 1.00 1 d . . .
 C2 C 0.3921(5) 0.7140(6) 1.0015(7) 0.068(2) Uani 1.00 1 d . . .
 C3 C 0.4619(7) 0.6800(8) 1.0461(9) 0.093(4) Uani 1.00 1 d . . .
 C4 C 0.4983(8) 0.6215(10) 1.0057(14) 0.114(5) Uani 1.00 1 d . . .
 C5 C 0.4651(7) 0.5952(8) 0.9204(12) 0.099(4) Uani 1.00 1 d . . .
 C6 C 0.3953(6) 0.6267(6) 0.8761(8) 0.067(2) Uani 1.00 1 d . . .
 C7 C 0.2540(6) 0.7421(6) 0.7308(6) 0.062(2) Uani 1.00 1 d . . .
 C8 C 0.3202(7) 0.7542(6) 0.6996(8) 0.074(3) Uani 1.00 1 d . . .
 C9 C 0.3208(9) 0.7738(7) 0.6116(9) 0.091(4) Uani 1.00 1 d . . .
 C10 C 0.2517(11) 0.7801(7) 0.5510(9) 0.108(5) Uani 1.00 1 d . . .
 C11 C 0.1864(10) 0.7702(8) 0.5774(9) 0.115(5) Uani 1.00 1 d . . .
 C12 C 0.1852(7) 0.7515(6) 0.6668(8) 0.082(3) Uani 1.00 1 d . . .
 C13 C 0.1963(4) 0.5539(5) 1.0036(5) 0.0437(19) Uani 1.00 1 d . . .
 C14 C 0.2721(5) 0.5243(5) 1.0154(7) 0.063(2) Uani 1.00 1 d . . .
 C15 C 0.3011(6) 0.4666(6) 1.0815(7) 0.070(2) Uani 1.00 1 d . . .
 C16 C 0.2571(8) 0.4360(6) 1.1353(7) 0.078(3) Uani 1.00 1 d . . .
 C17 C 0.1834(7) 0.4622(6) 1.1267(7) 0.079(3) Uani 1.00 1 d . . .
 C18 C 0.1540(6) 0.5215(6) 1.0618(6) 0.071(3) Uani 1.00 1 d . . .
 C19 C 0.0693(4) 0.5726(5) 0.8294(5) 0.0446(19) Uani 1.00 1 d . . .
 C20 C 0.0550(6) 0.4891(6) 0.8439(6) 0.062(2) Uani 1.00 1 d . . .
 C21 C -0.0053(6) 0.4471(6) 0.7907(7) 0.071(2) Uani 1.00 1 d . . .
 C22 C -0.0524(6) 0.4866(7) 0.7224(7) 0.067(2) Uani 1.00 1 d . . .
 C23 C -0.0406(5) 0.5694(6) 0.7040(7) 0.063(2) Uani 1.00 1 d . . .
 C24 C 0.0188(5) 0.6127(6) 0.7582(7) 0.061(2) Uani 1.00 1 d . . .
 C25 C 0.0160(4) 0.8018(5) 0.8917(5) 0.0454(19) Uani 1.00 1 d . . .
 C26 C -0.0498(5) 0.7589(6) 0.8974(7) 0.064(2) Uani 1.00 1 d . . .
 C27 C -0.1181(5) 0.7774(7) 0.8406(8) 0.077(3) Uani 1.00 1 d . . .
 C28 C -0.1228(6) 0.8394(8) 0.7753(9) 0.090(4) Uani 1.00 1 d . . .
 C29 C -0.0596(7) 0.8830(8) 0.7700(7) 0.085(3) Uani 1.00 1 d . . .
 C30 C 0.0105(5) 0.8639(6) 0.8276(6) 0.062(2) Uani 1.00 1 d . . .
 C31 C 0.1018(4) 0.7675(5) 1.0939(5) 0.0452(19) Uani 1.00 1 d . . .
 C32 C 0.0418(5) 0.8060(6) 1.1215(7) 0.064(2) Uani 1.00 1 d . . .
 C33 C 0.0373(7) 0.8074(8) 1.2113(8) 0.087(3) Uani 1.00 1 d . . .
 C34 C 0.0916(7) 0.7677(7) 1.2754(7) 0.080(3) Uani 1.00 1 d . . .
 C35 C 0.1514(6) 0.7302(6) 1.2484(7) 0.069(2) Uani 1.00 1 d . . .
 C36 C 0.1563(5) 0.7296(6) 1.1595(6) 0.055(2) Uani 1.00 1 d . . .
 C37 C 0.0989(6) 1.0139(7) 0.9998(9) 0.093(4) Uani 1.00 1 d . . .
 C38 C 0.2246(7) 0.9599(7) 1.1358(6) 0.085(3) Uani 1.00 1 d . . .
 C39 C 0.2778(8) 0.9789(8) 0.7750(9) 0.119(5) Uani 1.00 1 d . . .
 C40 C 0.4092(6) 0.9102(8) 0.8963(10) 0.110(5) Uani 1.00 1 d . . .
 C41 C 0.2503(8) 1.0608(6) 0.9857(9) 0.100(4) Uani 1.00 1 d . . .
 C42 C 0.3215(8) 1.0339(7) 0.9624(11) 0.115(5) Uani 1.00 1 d . . .
 H1 H 0.3692 0.7552 1.0305 0.081 Uiso 1.00 1 c R . .
 H2 H 0.4837 0.6976 1.1043 0.112 Uiso 1.00 1 c R . .
 H3 H 0.5452 0.5994 1.0354 0.137 Uiso 1.00 1 c R . .
 H4 H 0.4901 0.5555 0.8919 0.119 Uiso 1.00 1 c R . .
 H5 H 0.3736 0.6069 0.8188 0.081 Uiso 1.00 1 c R . .
 H6 H 0.3670 0.7487 0.7400 0.089 Uiso 1.00 1 c R . .
 H7 H 0.3669 0.7827 0.5934 0.109 Uiso 1.00 1 c R . .
 H8 H 0.2512 0.7915 0.4908 0.129 Uiso 1.00 1 c R . .
 H9 H 0.1402 0.7758 0.5356 0.138 Uiso 1.00 1 c R . .
 H10 H 0.1384 0.7452 0.6842 0.098 Uiso 1.00 1 c R . .
 H11 H 0.3034 0.5441 0.9779 0.076 Uiso 1.00 1 c R . .
 H12 H 0.3518 0.4489 1.0886 0.084 Uiso 1.00 1 c R . .
 H13 H 0.2771 0.3964 1.1790 0.094 Uiso 1.00 1 c R . .
 H14 H 0.1528 0.4406 1.1641 0.094 Uiso 1.00 1 c R . .
 H15 H 0.1037 0.5400 1.0575 0.085 Uiso 1.00 1 c R . .
 H16 H 0.0869 0.4606 0.8908 0.075 Uiso 1.00 1 c R . .
 H17 H -0.0136 0.3908 0.8020 0.085 Uiso 1.00 1 c R . .
 H18 H -0.0934 0.4576 0.6873 0.081 Uiso 1.00 1 c R . .
 H19 H -0.0724 0.5960 0.6556 0.076 Uiso 1.00 1 c R . .
 H20 H 0.0256 0.6694 0.7473 0.073 Uiso 1.00 1 c R . .
 H21 H -0.0479 0.7169 0.9404 0.077 Uiso 1.00 1 c R . .
 H22 H -0.1621 0.7480 0.8457 0.092 Uiso 1.00 1 c R . .
 H23 H -0.1693 0.8505 0.7359 0.108 Uiso 1.00 1 c R . .
 H24 H -0.0622 0.9261 0.7280 0.102 Uiso 1.00 1 c R . .
 H25 H 0.0544 0.8937 0.8224 0.075 Uiso 1.00 1 c R . .
 H26 H 0.0034 0.8316 1.0790 0.077 Uiso 1.00 1 c R . .
 H27 H -0.0031 0.8356 1.2286 0.105 Uiso 1.00 1 c R . .
 H28 H 0.0875 0.7666 1.3355 0.096 Uiso 1.00 1 c R . .
 H29 H 0.1898 0.7046 1.2909 0.083 Uiso 1.00 1 c R . .
 H30 H 0.1977 0.7027 1.1430 0.066 Uiso 1.00 1 c R . .
 H31 H 0.0905 1.0550 0.9524 0.111 Uiso 1.00 1 c R . .
 H32 H 0.0925 1.0397 1.0550 0.111 Uiso 1.00 1 c R . .
 H33 H 0.0624 0.9691 0.9845 0.111 Uiso 1.00 1 c R . .
 H34 H 0.1832 0.9358 1.1591 0.102 Uiso 1.00 1 c R . .
 H35 H 0.2378 1.0136 1.1634 0.102 Uiso 1.00 1 c R . .
 H36 H 0.2685 0.9234 1.1490 0.102 Uiso 1.00 1 c R . .
 H37 H 0.2930 0.9397 0.7339 0.143 Uiso 1.00 1 c R . .
 H38 H 0.3004 1.0326 0.7685 0.143 Uiso 1.00 1 c R . .
 H39 H 0.2228 0.9840 0.7618 0.143 Uiso 1.00 1 c R . .
 H40 H 0.4395 0.9263 0.9539 0.132 Uiso 1.00 1 c R . .
 H41 H 0.4290 0.9373 0.8493 0.132 Uiso 1.00 1 c R . .
 H42 H 0.4117 0.8504 0.8894 0.132 Uiso 1.00 1 c R . .
 H43 H 0.2198 1.0913 0.9353 0.120 Uiso 1.00 1 c R . .
 H44 H 0.2618 1.0988 1.0368 0.120 Uiso 1.00 1 c R . .
 H45 H 0.3587 1.0213 1.0173 0.138 Uiso 1.00 1 c R . .
 H46 H 0.3419 1.0797 0.9323 0.138 Uiso 1.00 1 c R . .


loop_
_atom_site_aniso_label
_atom_site_aniso_U_11
_atom_site_aniso_U_22
_atom_site_aniso_U_33
_atom_site_aniso_U_12
_atom_site_aniso_U_13
_atom_site_aniso_U_23
 Pt1 0.04509(18) 0.03532(16) 0.04701(18) -0.00046(16) 0.01965(13) 0.00146(15)
 Ge1 0.0483(5) 0.0462(5) 0.0548(5) 0.0056(4) 0.0198(4) -0.0067(4)
 Ge2 0.0485(5) 0.0396(4) 0.0448(4) 0.0057(4) 0.0143(4) -0.0001(4)
 Ge3 0.0388(4) 0.0388(4) 0.0471(5) 0.0031(3) 0.0179(3) 0.0009(3)
 P1 0.0603(15) 0.0449(12) 0.0572(15) 0.0031(11) 0.0152(12) -0.0103(11)
 P2 0.087(2) 0.0565(16) 0.095(2) -0.0208(15) 0.0517(18) 0.0014(15)
 C1 0.034(4) 0.058(5) 0.065(6) 0.001(4) 0.014(4) 0.009(4)
 C2 0.055(6) 0.074(7) 0.072(7) -0.007(5) 0.006(5) 0.008(5)
 C3 0.071(8) 0.099(9) 0.100(10) -0.010(7) -0.004(7) 0.035(8)
 C4 0.070(9) 0.099(12) 0.169(17) 0.015(8) 0.015(10) 0.058(11)
 C5 0.069(8) 0.075(8) 0.169(15) 0.016(7) 0.062(9) 0.024(9)
 C6 0.060(6) 0.059(6) 0.089(7) 0.011(5) 0.030(5) 0.015(5)
 C7 0.085(7) 0.058(6) 0.045(5) 0.021(5) 0.019(5) -0.003(4)
 C8 0.086(7) 0.064(6) 0.080(7) 0.000(6) 0.034(6) -0.003(5)
 C9 0.139(12) 0.069(7) 0.082(9) 0.015(8) 0.063(9) 0.005(6)
 C10 0.207(18) 0.062(7) 0.063(8) 0.054(9) 0.050(10) 0.017(6)
 C11 0.171(16) 0.109(11) 0.061(8) 0.078(11) 0.015(9) 0.009(7)
 C12 0.108(9) 0.073(7) 0.068(7) 0.035(6) 0.028(7) -0.002(5)
 C13 0.043(4) 0.047(4) 0.039(4) 0.005(3) 0.003(3) 0.001(3)
 C14 0.059(6) 0.049(5) 0.078(7) -0.004(4) 0.006(5) 0.011(5)
 C15 0.063(6) 0.068(6) 0.075(7) 0.017(5) 0.004(5) 0.013(5)
 C16 0.127(11) 0.057(6) 0.047(6) 0.031(7) 0.008(6) -0.001(4)
 C17 0.121(10) 0.069(7) 0.060(6) 0.013(7) 0.049(6) 0.021(5)
 C18 0.093(8) 0.071(6) 0.059(6) 0.025(6) 0.043(5) 0.013(5)
 C19 0.052(5) 0.042(4) 0.040(4) 0.004(4) 0.010(3) -0.001(3)
 C20 0.082(7) 0.052(5) 0.051(5) 0.001(5) 0.009(5) -0.008(4)
 C21 0.090(8) 0.059(6) 0.066(7) -0.012(6) 0.018(6) -0.016(5)
 C22 0.057(6) 0.081(7) 0.064(6) -0.015(5) 0.010(5) -0.018(5)
 C23 0.051(5) 0.077(7) 0.062(6) 0.002(5) 0.008(4) -0.004(5)
 C24 0.059(6) 0.056(5) 0.071(6) 0.004(4) 0.026(5) -0.005(5)
 C25 0.045(4) 0.045(4) 0.048(4) 0.004(3) 0.015(4) -0.011(3)
 C26 0.045(5) 0.062(6) 0.085(7) -0.004(4) 0.014(5) -0.003(5)
 C27 0.045(6) 0.084(8) 0.098(9) -0.005(5) 0.007(5) -0.025(7)
 C28 0.051(6) 0.111(10) 0.090(9) 0.018(6) -0.026(6) -0.027(8)
 C29 0.086(8) 0.099(9) 0.060(7) 0.022(7) -0.010(6) -0.001(6)
 C30 0.057(5) 0.077(6) 0.052(5) -0.003(5) 0.010(4) 0.002(5)
 C31 0.046(4) 0.042(4) 0.052(5) -0.007(3) 0.021(4) -0.003(3)
 C32 0.066(6) 0.062(6) 0.071(6) 0.012(5) 0.031(5) -0.004(5)
 C33 0.093(9) 0.102(9) 0.085(8) -0.011(7) 0.061(7) -0.032(7)
 C34 0.098(9) 0.105(9) 0.041(5) -0.054(7) 0.024(6) -0.025(6)
 C35 0.073(7) 0.074(7) 0.058(6) -0.018(5) 0.006(5) 0.006(5)
 C36 0.047(5) 0.065(5) 0.054(5) -0.010(4) 0.014(4) -0.003(4)
 C37 0.067(7) 0.084(8) 0.117(10) 0.037(6) -0.002(6) -0.041(7)
 C38 0.118(10) 0.081(7) 0.054(6) -0.010(7) 0.010(6) -0.021(5)
 C39 0.163(15) 0.095(9) 0.118(12) -0.009(9) 0.071(11) 0.042(8)
 C40 0.071(8) 0.126(11) 0.146(13) -0.043(8) 0.055(8) -0.020(10)
 C41 0.161(14) 0.045(6) 0.100(10) -0.013(7) 0.045(9) -0.015(6)
 C42 0.129(12) 0.066(7) 0.173(15) -0.045(8) 0.084(11) -0.032(8)

#==============================================================================

_computing_data_collection            'WinAFC'
_computing_cell_refinement            'WinAFC'
_computing_data_reduction             'CrystalStructure'
_computing_structure_solution         'SHELXS97'
_computing_structure_refinement       'SHELXL'
_computing_publication_material       'CrystalStructure 3.8'
_computing_molecular_graphics          ?

#==============================================================================

# MOLECULAR GEOMETRY

_geom_special_details
;
    ENTER SPECIAL DETAILS OF THE MOLECULAR GEOMETRY
;

loop_
_geom_bond_atom_site_label_1
_geom_bond_atom_site_label_2
_geom_bond_distance
_geom_bond_publ_flag
_geom_bond_site_symmetry_1
_geom_bond_site_symmetry_2
Pt1 Ge1 2.4513(10) yes . .
Pt1 Ge3 2.4542(9) yes . .
Pt1 P1 2.282(2) yes . .
Pt1 P2 2.278(3) yes . .
Ge1 Ge2 2.5781(13) yes . .
Ge1 C1 1.957(8) yes . .
Ge1 C7 1.973(10) yes . .
Ge2 Ge3 2.4563(11) yes . .
Ge2 C13 1.963(7) yes . .
Ge2 C19 1.987(7) yes . .
Ge3 C25 1.982(7) yes . .
Ge3 C31 1.986(9) yes . .
P1 C37 1.794(11) yes . .
P1 C38 1.826(10) yes . .
P1 C41 1.818(13) yes . .
P2 C39 1.808(14) yes . .
P2 C40 1.817(12) yes . .
P2 C42 1.825(14) yes . .
C1 C2 1.376(13) yes . .
C1 C6 1.430(14) yes . .
C2 C3 1.394(15) yes . .
C3 C4 1.35(2) yes . .
C4 C5 1.37(2) yes . .
C5 C6 1.376(16) yes . .
C7 C8 1.371(18) yes . .
C7 C12 1.401(15) yes . .
C8 C9 1.372(19) yes . .
C9 C10 1.38(2) yes . .
C10 C11 1.31(2) yes . .
C11 C12 1.393(19) yes . .
C13 C14 1.403(13) yes . .
C13 C18 1.375(14) yes . .
C14 C15 1.377(14) yes . .
C15 C16 1.336(18) yes . .
C16 C17 1.355(19) yes . .
C17 C18 1.385(14) yes . .
C19 C20 1.380(12) yes . .
C19 C24 1.405(12) yes . .
C20 C21 1.374(14) yes . .
C21 C22 1.345(14) yes . .
C22 C23 1.372(15) yes . .
C23 C24 1.381(13) yes . .
C25 C26 1.373(13) yes . .
C25 C30 1.376(13) yes . .
C26 C27 1.366(13) yes . .
C27 C28 1.388(18) yes . .
C28 C29 1.339(18) yes . .
C29 C30 1.398(14) yes . .
C31 C32 1.371(14) yes . .
C31 C36 1.375(11) yes . .
C32 C33 1.381(17) yes . .
C33 C34 1.372(16) yes . .
C34 C35 1.356(18) yes . .
C35 C36 1.368(14) yes . .
C41 C42 1.45(2) yes . .
C2 H1 0.930 no . .
C3 H2 0.930 no . .
C4 H3 0.930 no . .
C5 H4 0.930 no . .
C6 H5 0.930 no . .
C8 H6 0.930 no . .
C9 H7 0.930 no . .
C10 H8 0.930 no . .
C11 H9 0.930 no . .
C12 H10 0.930 no . .
C14 H11 0.930 no . .
C15 H12 0.930 no . .
C16 H13 0.930 no . .
C17 H14 0.930 no . .
C18 H15 0.930 no . .
C20 H16 0.930 no . .
C21 H17 0.930 no . .
C22 H18 0.930 no . .
C23 H19 0.930 no . .
C24 H20 0.930 no . .
C26 H21 0.930 no . .
C27 H22 0.930 no . .
C28 H23 0.930 no . .
C29 H24 0.930 no . .
C30 H25 0.930 no . .
C32 H26 0.930 no . .
C33 H27 0.930 no . .
C34 H28 0.930 no . .
C35 H29 0.930 no . .
C36 H30 0.930 no . .
C37 H31 0.960 no . .
C37 H32 0.960 no . .
C37 H33 0.960 no . .
C38 H34 0.960 no . .
C38 H35 0.960 no . .
C38 H36 0.960 no . .
C39 H37 0.960 no . .
C39 H38 0.960 no . .
C39 H39 0.960 no . .
C40 H40 0.960 no . .
C40 H41 0.960 no . .
C40 H42 0.960 no . .
C41 H43 0.970 no . .
C41 H44 0.970 no . .
C42 H45 0.970 no . .
C42 H46 0.970 no . .

loop_
_geom_angle_atom_site_label_1
_geom_angle_atom_site_label_2
_geom_angle_atom_site_label_3
_geom_angle
_geom_angle_publ_flag
_geom_angle_site_symmetry_1
_geom_angle_site_symmetry_2
_geom_angle_site_symmetry_3
Ge1 Pt1 Ge3 83.14(3) yes . . .
Ge1 Pt1 P1 175.29(6) yes . . .
Ge1 Pt1 P2 95.59(8) yes . . .
Ge3 Pt1 P1 95.82(7) yes . . .
Ge3 Pt1 P2 174.53(8) yes . . .
P1 Pt1 P2 85.87(10) yes . . .
Pt1 Ge1 Ge2 96.32(3) yes . . .
Pt1 Ge1 C1 111.8(2) yes . . .
Pt1 Ge1 C7 115.6(2) yes . . .
Ge2 Ge1 C1 108.2(2) yes . . .
Ge2 Ge1 C7 119.5(3) yes . . .
C1 Ge1 C7 105.4(4) yes . . .
Ge1 Ge2 Ge3 80.53(3) yes . . .
Ge1 Ge2 C13 114.2(2) yes . . .
Ge1 Ge2 C19 126.3(2) yes . . .
Ge3 Ge2 C13 114.6(2) yes . . .
Ge3 Ge2 C19 116.5(2) yes . . .
C13 Ge2 C19 104.0(3) yes . . .
Pt1 Ge3 Ge2 99.50(4) yes . . .
Pt1 Ge3 C25 111.3(2) yes . . .
Pt1 Ge3 C31 118.2(2) yes . . .
Ge2 Ge3 C25 106.4(2) yes . . .
Ge2 Ge3 C31 114.7(2) yes . . .
C25 Ge3 C31 106.2(3) yes . . .
Pt1 P1 C37 121.2(3) yes . . .
Pt1 P1 C38 113.5(3) yes . . .
Pt1 P1 C41 108.0(4) yes . . .
C37 P1 C38 103.4(6) yes . . .
C37 P1 C41 103.9(5) yes . . .
C38 P1 C41 105.5(5) yes . . .
Pt1 P2 C39 112.0(5) yes . . .
Pt1 P2 C40 123.6(4) yes . . .
Pt1 P2 C42 106.4(5) yes . . .
C39 P2 C40 104.8(7) yes . . .
C39 P2 C42 107.0(6) yes . . .
C40 P2 C42 101.7(6) yes . . .
Ge1 C1 C2 121.6(7) yes . . .
Ge1 C1 C6 123.3(6) yes . . .
C2 C1 C6 114.9(8) yes . . .
C1 C2 C3 122.8(10) yes . . .
C2 C3 C4 120.7(13) yes . . .
C3 C4 C5 119.1(13) yes . . .
C4 C5 C6 121.1(14) yes . . .
C1 C6 C5 121.4(11) yes . . .
Ge1 C7 C8 122.6(7) yes . . .
Ge1 C7 C12 120.9(9) yes . . .
C8 C7 C12 115.7(10) yes . . .
C7 C8 C9 123.2(11) yes . . .
C8 C9 C10 118.7(15) yes . . .
C9 C10 C11 120.7(13) yes . . .
C10 C11 C12 121.0(13) yes . . .
C7 C12 C11 120.6(13) yes . . .
Ge2 C13 C14 122.6(7) yes . . .
Ge2 C13 C18 121.8(6) yes . . .
C14 C13 C18 115.6(8) yes . . .
C13 C14 C15 121.4(10) yes . . .
C14 C15 C16 120.6(10) yes . . .
C15 C16 C17 120.4(10) yes . . .
C16 C17 C18 119.5(11) yes . . .
C13 C18 C17 122.4(10) yes . . .
Ge2 C19 C20 121.8(6) yes . . .
Ge2 C19 C24 121.2(6) yes . . .
C20 C19 C24 116.8(7) yes . . .
C19 C20 C21 121.5(8) yes . . .
C20 C21 C22 120.6(10) yes . . .
C21 C22 C23 120.6(9) yes . . .
C22 C23 C24 119.3(9) yes . . .
C19 C24 C23 121.1(9) yes . . .
Ge3 C25 C26 121.2(6) yes . . .
Ge3 C25 C30 120.8(6) yes . . .
C26 C25 C30 117.8(7) yes . . .
C25 C26 C27 120.6(10) yes . . .
C26 C27 C28 121.2(10) yes . . .
C27 C28 C29 119.0(10) yes . . .
C28 C29 C30 120.0(11) yes . . .
C25 C30 C29 121.4(10) yes . . .
Ge3 C31 C32 123.5(6) yes . . .
Ge3 C31 C36 119.5(7) yes . . .
C32 C31 C36 116.8(8) yes . . .
C31 C32 C33 121.2(9) yes . . .
C32 C33 C34 121.0(12) yes . . .
C33 C34 C35 118.0(11) yes . . .
C34 C35 C36 121.0(9) yes . . .
C31 C36 C35 122.0(9) yes . . .
P1 C41 C42 112.1(8) yes . . .
P2 C42 C41 113.1(9) yes . . .
C1 C2 H1 118.6 no . . .
C3 C2 H1 118.6 no . . .
C2 C3 H2 119.7 no . . .
C4 C3 H2 119.7 no . . .
C3 C4 H3 120.5 no . . .
C5 C4 H3 120.5 no . . .
C4 C5 H4 119.5 no . . .
C6 C5 H4 119.5 no . . .
C1 C6 H5 119.3 no . . .
C5 C6 H5 119.3 no . . .
C7 C8 H6 118.4 no . . .
C9 C8 H6 118.4 no . . .
C8 C9 H7 120.7 no . . .
C10 C9 H7 120.7 no . . .
C9 C10 H8 119.6 no . . .
C11 C10 H8 119.6 no . . .
C10 C11 H9 119.5 no . . .
C12 C11 H9 119.5 no . . .
C7 C12 H10 119.7 no . . .
C11 C12 H10 119.7 no . . .
C13 C14 H11 119.3 no . . .
C15 C14 H11 119.3 no . . .
C14 C15 H12 119.7 no . . .
C16 C15 H12 119.7 no . . .
C15 C16 H13 119.8 no . . .
C17 C16 H13 119.8 no . . .
C16 C17 H14 120.2 no . . .
C18 C17 H14 120.2 no . . .
C13 C18 H15 118.8 no . . .
C17 C18 H15 118.8 no . . .
C19 C20 H16 119.3 no . . .
C21 C20 H16 119.2 no . . .
C20 C21 H17 119.7 no . . .
C22 C21 H17 119.7 no . . .
C21 C22 H18 119.7 no . . .
C23 C22 H18 119.7 no . . .
C22 C23 H19 120.3 no . . .
C24 C23 H19 120.3 no . . .
C19 C24 H20 119.4 no . . .
C23 C24 H20 119.4 no . . .
C25 C26 H21 119.7 no . . .
C27 C26 H21 119.7 no . . .
C26 C27 H22 119.4 no . . .
C28 C27 H22 119.4 no . . .
C27 C28 H23 120.5 no . . .
C29 C28 H23 120.5 no . . .
C28 C29 H24 120.0 no . . .
C30 C29 H24 120.0 no . . .
C25 C30 H25 119.3 no . . .
C29 C30 H25 119.3 no . . .
C31 C32 H26 119.4 no . . .
C33 C32 H26 119.4 no . . .
C32 C33 H27 119.5 no . . .
C34 C33 H27 119.5 no . . .
C33 C34 H28 121.0 no . . .
C35 C34 H28 121.0 no . . .
C34 C35 H29 119.5 no . . .
C36 C35 H29 119.5 no . . .
C31 C36 H30 119.0 no . . .
C35 C36 H30 119.0 no . . .
P1 C37 H31 109.5 no . . .
P1 C37 H32 109.5 no . . .
P1 C37 H33 109.5 no . . .
H31 C37 H32 109.5 no . . .
H31 C37 H33 109.5 no . . .
H32 C37 H33 109.5 no . . .
P1 C38 H34 109.5 no . . .
P1 C38 H35 109.5 no . . .
P1 C38 H36 109.5 no . . .
H34 C38 H35 109.5 no . . .
H34 C38 H36 109.5 no . . .
H35 C38 H36 109.5 no . . .
P2 C39 H37 109.5 no . . .
P2 C39 H38 109.5 no . . .
P2 C39 H39 109.5 no . . .
H37 C39 H38 109.5 no . . .
H37 C39 H39 109.5 no . . .
H38 C39 H39 109.5 no . . .
P2 C40 H40 109.5 no . . .
P2 C40 H41 109.5 no . . .
P2 C40 H42 109.5 no . . .
H40 C40 H41 109.5 no . . .
H40 C40 H42 109.5 no . . .
H41 C40 H42 109.5 no . . .
P1 C41 H43 109.2 no . . .
P1 C41 H44 109.2 no . . .
C42 C41 H43 109.2 no . . .
C42 C41 H44 109.2 no . . .
H43 C41 H44 107.9 no . . .
P2 C42 H45 109.0 no . . .
P2 C42 H46 109.0 no . . .
C41 C42 H45 109.0 no . . .
C41 C42 H46 109.0 no . . .
H45 C42 H46 107.8 no . . .


#==============================================================================

data___complex3

#==============================================================================

# CHEMICAL DATA

_chemical_formula_sum                  'C61 H64 Ge4 P2 Pt '
_chemical_formula_moiety               'C61 H64 Ge4 P2 Pt '
_chemical_formula_weight               1344.57
_chemical_melting_point                ?

#==============================================================================

# CRYSTAL DATA
_symmetry_cell_setting                 orthorhombic
_symmetry_space_group_name_H-M        'P 21 21 21'
_symmetry_space_group_name_Hall       'P 2ac 2ab'
_symmetry_Int_Tables_number            19
loop_
_symmetry_equiv_pos_site_id
_symmetry_equiv_pos_as_xyz
1   '+X,+Y,+Z'
2   '1/2+X,1/2-Y,-Z'
3   '-X,1/2+Y,1/2-Z'
4   '1/2-X,-Y,1/2+Z'

#------------------------------------------------------------------------------

_cell_length_a                         11.927(2)
_cell_length_b                         20.208(4)
_cell_length_c                         23.619(4)
_cell_angle_alpha                      90.0000
_cell_angle_beta                       90.0000
_cell_angle_gamma                      90.0000
_cell_volume                           5692.6(17)
_cell_formula_units_Z                  4
_cell_measurement_reflns_used          21246
_cell_measurement_theta_min            3.0
_cell_measurement_theta_max            27.5
_cell_measurement_temperature          113.1

#------------------------------------------------------------------------------

_exptl_crystal_description            'prism'
_exptl_crystal_colour                 'colorless'
_exptl_crystal_size_max                0.52
_exptl_crystal_size_mid                0.41
_exptl_crystal_size_min                0.25
_exptl_crystal_density_diffrn          1.569
_exptl_crystal_density_meas            ?
_exptl_crystal_density_method         'not measured'
_exptl_crystal_F_000                   2664.00
_exptl_absorpt_coefficient_mu          4.618
_exptl_absorpt_correction_type         multi-scan
_exptl_absorpt_process_details         
'Jacobson, R. (1998) Private communication'
_exptl_absorpt_correction_T_min        0.189
_exptl_absorpt_correction_T_max        0.315

#==============================================================================

# EXPERIMENTAL DATA

_diffrn_radiation_type                'Mo K\a'
_diffrn_radiation_wavelength           0.71070
_diffrn_measurement_device_type       'Rigaku Saturn'
_diffrn_measurement_method             \w
_diffrn_detector_area_resol_mean       7.31
_diffrn_reflns_number                  47180
_diffrn_reflns_av_R_equivalents        0.034
_diffrn_reflns_theta_max               27.48
_diffrn_measured_fraction_theta_max    0.993
_diffrn_reflns_theta_full              27.48
_diffrn_measured_fraction_theta_full   0.993
_diffrn_reflns_limit_h_min             -15
_diffrn_reflns_limit_h_max             14
_diffrn_reflns_limit_k_min             -26
_diffrn_reflns_limit_k_max             21
_diffrn_reflns_limit_l_min             -30
_diffrn_reflns_limit_l_max             30

#==============================================================================

# REFINEMENT DATA

_refine_special_details
;
    Refinement was performed using all reflections. The weighted 
    R-factor (wR) and goodness of fit (S) are based on F^2^.
    R-factor (gt) are based on F. The threshold expression of
    F^2^ > 2.0 sigma(F^2^) is used only for calculating R-factor (gt).
;
_reflns_number_total                   12988
_reflns_number_gt                      12248
_reflns_threshold_expression           F^2^>2.0\s(F^2^)
_refine_ls_structure_factor_coef       Fsqd
_refine_ls_R_factor_gt                 0.0273
_refine_ls_R_factor_all                0.0293 
_refine_ls_wR_factor_ref               0.0487
_refine_ls_wR_factor_gt                0.0479 
_refine_ls_hydrogen_treatment          refall
_refine_ls_number_reflns               12988
_refine_ls_number_parameters           614
_refine_ls_goodness_of_fit_ref         1.001
_refine_ls_weighting_scheme            calc
_refine_ls_weighting_details
   'w = 1/[\s^2^(Fo^2^)+(0.0095P)^2^+0.0000P] where P=(Fo^2^+2Fc^2^)/3'
_refine_ls_shift/su_max                0.0030
_refine_diff_density_max               1.28
_refine_diff_density_min               -0.50
_refine_ls_extinction_method           none
_refine_ls_extinction_coef             ?
_refine_ls_abs_structure_details
   'Flack, H. D. (1983), Acta Cryst. A39, 876-881.  5854 Friedel Pairs'
_refine_ls_abs_structure_Flack         -0.018(3)

loop_
_atom_type_symbol
_atom_type_description
_atom_type_scat_dispersion_real
_atom_type_scat_dispersion_imag
_atom_type_scat_source
  'C' 'C'  0.003 0.002 
;
International Tables for Crystallography
(1992, Vol. C, Tables 4.2.6.8 and 6.1.1.4)
;
  'H' 'H'  0.000 0.000 
;
International Tables for Crystallography
(1992, Vol. C, Table 6.1.1.4)
;
  'Ge' 'Ge'  0.155 1.800 
;
International Tables for Crystallography
(1992, Vol. C, Tables 4.2.6.8 and 6.1.1.4)
;
  'P' 'P'  0.102 0.094 
;
International Tables for Crystallography
(1992, Vol. C, Tables 4.2.6.8 and 6.1.1.4)
;
  'Pt' 'Pt'  -1.703 8.390 
;
International Tables for Crystallography
(1992, Vol. C, Tables 4.2.6.8 and 6.1.1.4)
;

#==============================================================================

# ATOMIC COORDINATES AND THERMAL PARAMETERS

loop_
_atom_site_label
_atom_site_type_symbol
_atom_site_fract_x
_atom_site_fract_y
_atom_site_fract_z
_atom_site_U_iso_or_equiv
_atom_site_adp_type
_atom_site_occupancy
_atom_site_symmetry_multiplicity
_atom_site_calc_flag
_atom_site_refinement_flags
_atom_site_disorder_assembly
_atom_site_disorder_group
 Pt1 Pt 0.956381(12) 0.981044(7) 0.229073(6) 0.02032(3) Uani 1.00 1 d . . .
 Ge1 Ge 0.81092(3) 0.89790(2) 0.249803(16) 0.02077(8) Uani 1.00 1 d . . .
 Ge2 Ge 0.62969(3) 0.942024(19) 0.222569(18) 0.02363(8) Uani 1.00 1 d . . .
 Ge3 Ge 0.66775(3) 0.97965(2) 0.127331(16) 0.02424(8) Uani 1.00 1 d . . .
 Ge4 Ge 0.87082(3) 1.000370(18) 0.134958(16) 0.02097(8) Uani 1.00 1 d . . .
 P1 P 1.10302(9) 1.04919(6) 0.20719(5) 0.0335(2) Uani 1.00 1 d . . .
 P2 P 1.04068(10) 0.96986(6) 0.31542(4) 0.0322(2) Uani 1.00 1 d . . .
 C1 C 0.8447(3) 0.81663(18) 0.20536(16) 0.0269(9) Uani 1.00 1 d . . .
 C2 C 0.7617(4) 0.7755(2) 0.18452(19) 0.0440(12) Uani 1.00 1 d . . .
 C3 C 0.7906(5) 0.7203(2) 0.1507(2) 0.0557(14) Uani 1.00 1 d . . .
 C4 C 0.8986(5) 0.7081(2) 0.1375(2) 0.0544(15) Uani 1.00 1 d . . .
 C5 C 0.9808(4) 0.7478(2) 0.1588(2) 0.0588(16) Uani 1.00 1 d . . .
 C6 C 0.9540(4) 0.8023(2) 0.19225(19) 0.0441(11) Uani 1.00 1 d . . .
 C7 C 0.7837(3) 0.86370(19) 0.32766(15) 0.0235(8) Uani 1.00 1 d . . .
 C8 C 0.8214(3) 0.8020(2) 0.34367(17) 0.0285(9) Uani 1.00 1 d . . .
 C9 C 0.7981(3) 0.7765(2) 0.39752(18) 0.0361(10) Uani 1.00 1 d . . .
 C10 C 0.7389(3) 0.8127(2) 0.43612(17) 0.0347(10) Uani 1.00 1 d . . .
 C11 C 0.6986(3) 0.8752(2) 0.42065(17) 0.0352(11) Uani 1.00 1 d . . .
 C12 C 0.7214(3) 0.8994(2) 0.36704(17) 0.0305(9) Uani 1.00 1 d . . .
 C13 C 0.4970(3) 0.88497(19) 0.22736(19) 0.0295(9) Uani 1.00 1 d . . .
 C14 C 0.4053(3) 0.8972(2) 0.1936(2) 0.0453(12) Uani 1.00 1 d . . .
 C15 C 0.3100(4) 0.8563(2) 0.1948(2) 0.0581(15) Uani 1.00 1 d . . .
 C16 C 0.3088(3) 0.8025(2) 0.2304(2) 0.0460(12) Uani 1.00 1 d . . .
 C17 C 0.3988(3) 0.7890(2) 0.2640(2) 0.0477(12) Uani 1.00 1 d . . .
 C18 C 0.4917(3) 0.8296(2) 0.26187(18) 0.0355(10) Uani 1.00 1 d . . .
 C19 C 0.6060(2) 1.02122(18) 0.26990(15) 0.0257(7) Uani 1.00 1 d . . .
 C20 C 0.6947(3) 1.0657(2) 0.27977(17) 0.0351(10) Uani 1.00 1 d . . .
 C21 C 0.6751(4) 1.1248(2) 0.30848(19) 0.0430(11) Uani 1.00 1 d . . .
 C22 C 0.5701(3) 1.1409(2) 0.32859(18) 0.0413(11) Uani 1.00 1 d . . .
 C23 C 0.4857(3) 1.0955(2) 0.32120(19) 0.0448(12) Uani 1.00 1 d . . .
 C24 C 0.5026(3) 1.0368(2) 0.29251(17) 0.0330(10) Uani 1.00 1 d . . .
 C25 C 0.5843(3) 1.0597(2) 0.10540(17) 0.0286(9) Uani 1.00 1 d . . .
 C26 C 0.5987(3) 1.0850(2) 0.05144(19) 0.0420(12) Uani 1.00 1 d . . .
 C27 C 0.5457(4) 1.1438(2) 0.0352(2) 0.0570(14) Uani 1.00 1 d . . .
 C28 C 0.4790(3) 1.1777(2) 0.0716(2) 0.0482(13) Uani 1.00 1 d . . .
 C29 C 0.4645(4) 1.1530(2) 0.1254(2) 0.0475(12) Uani 1.00 1 d . . .
 C30 C 0.5171(3) 1.0940(2) 0.14155(18) 0.0372(11) Uani 1.00 1 d . . .
 C31 C 0.6244(4) 0.9107(2) 0.07396(18) 0.0409(11) Uani 1.00 1 d . . .
 C32 C 0.6889(4) 0.8563(2) 0.0622(2) 0.0485(13) Uani 1.00 1 d . . .
 C33 C 0.6534(6) 0.8065(2) 0.0259(2) 0.079(2) Uani 1.00 1 d . . .
 C34 C 0.5497(7) 0.8104(2) 0.0013(2) 0.103(2) Uani 1.00 1 d . . .
 C35 C 0.4799(6) 0.8635(3) 0.0124(3) 0.111(3) Uani 1.00 1 d . . .
 C36 C 0.5176(5) 0.9131(3) 0.0481(2) 0.077(2) Uani 1.00 1 d . . .
 C37 C 0.9390(3) 0.95056(19) 0.07244(16) 0.0302(9) Uani 1.00 1 d . . .
 C38 C 1.0252(4) 0.9058(2) 0.0812(2) 0.0517(13) Uani 1.00 1 d . . .
 C39 C 1.0676(5) 0.8666(2) 0.0369(2) 0.078(2) Uani 1.00 1 d . . .
 C40 C 1.0198(5) 0.8729(2) -0.0173(2) 0.082(2) Uani 1.00 1 d . . .
 C41 C 0.9368(5) 0.9183(2) -0.0274(2) 0.0630(16) Uani 1.00 1 d . . .
 C42 C 0.8952(3) 0.9564(2) 0.01706(17) 0.0378(11) Uani 1.00 1 d . . .
 C43 C 0.8807(3) 1.09477(17) 0.11212(14) 0.0209(8) Uani 1.00 1 d . . .
 C44 C 0.9458(3) 1.11594(18) 0.06667(15) 0.0237(8) Uani 1.00 1 d . . .
 C45 C 0.9576(3) 1.18286(19) 0.05459(16) 0.0300(9) Uani 1.00 1 d . . .
 C46 C 0.9019(3) 1.2297(2) 0.08715(18) 0.0328(10) Uani 1.00 1 d . . .
 C47 C 0.8329(3) 1.2096(2) 0.13116(17) 0.0329(10) Uani 1.00 1 d . . .
 C48 C 0.8235(3) 1.14222(18) 0.14342(16) 0.0254(8) Uani 1.00 1 d . . .
 C49 C 1.2130(3) 1.0327(2) 0.25964(18) 0.0470(13) Uani 1.00 1 d . . .
 C50 C 1.1605(3) 1.0274(2) 0.3173(2) 0.0499(13) Uani 1.00 1 d . . .
 C51 C 1.0825(3) 1.1380(2) 0.2122(2) 0.0515(14) Uani 1.00 1 d . . .
 C52 C 1.1801(3) 1.0392(2) 0.14125(18) 0.0490(13) Uani 1.00 1 d . . .
 C53 C 0.9654(3) 0.9910(2) 0.38012(17) 0.0624(15) Uani 1.00 1 d . . .
 C54 C 1.1029(3) 0.8911(2) 0.33108(19) 0.0471(13) Uani 1.00 1 d . . .
 C55 C 0.6433(5) 0.4612(3) 0.0698(3) 0.073(2) Uani 1.00 1 d . . .
 C56 C 0.7209(6) 0.4434(4) 0.0285(2) 0.090(2) Uani 1.00 1 d . . .
 C57 C 0.7380(5) 0.3725(4) 0.0193(2) 0.070(2) Uani 1.00 1 d . . .
 C58 C 0.6739(5) 0.3300(3) 0.0506(2) 0.0714(19) Uani 1.00 1 d . . .
 C59 C 0.6031(5) 0.3485(4) 0.0891(2) 0.086(2) Uani 1.00 1 d . . .
 C60 C 0.5880(5) 0.4134(4) 0.0979(3) 0.098(2) Uani 1.00 1 d . . .
 C61 C 0.7791(6) 0.4931(5) -0.0000(2) 0.222(5) Uani 1.00 1 d . . .
 H1 H 0.6853 0.7843 0.1929 0.053 Uiso 1.00 1 c R . .
 H2 H 0.7335 0.6916 0.1371 0.067 Uiso 1.00 1 c R . .
 H3 H 0.9173 0.6720 0.1135 0.065 Uiso 1.00 1 c R . .
 H4 H 1.0572 0.7381 0.1508 0.071 Uiso 1.00 1 c R . .
 H5 H 1.0123 0.8300 0.2061 0.053 Uiso 1.00 1 c R . .
 H6 H 0.8640 0.7764 0.3177 0.034 Uiso 1.00 1 c R . .
 H7 H 0.8237 0.7335 0.4073 0.043 Uiso 1.00 1 c R . .
 H8 H 0.7253 0.7957 0.4730 0.042 Uiso 1.00 1 c R . .
 H9 H 0.6561 0.9007 0.4467 0.042 Uiso 1.00 1 c R . .
 H10 H 0.6935 0.9417 0.3568 0.037 Uiso 1.00 1 c R . .
 H11 H 0.4065 0.9342 0.1688 0.054 Uiso 1.00 1 c R . .
 H12 H 0.2473 0.8658 0.1713 0.070 Uiso 1.00 1 c R . .
 H13 H 0.2448 0.7745 0.2316 0.055 Uiso 1.00 1 c R . .
 H14 H 0.3976 0.7519 0.2886 0.057 Uiso 1.00 1 c R . .
 H15 H 0.5545 0.8193 0.2850 0.043 Uiso 1.00 1 c R . .
 H16 H 0.7681 1.0554 0.2668 0.042 Uiso 1.00 1 c R . .
 H17 H 0.7355 1.1547 0.3143 0.052 Uiso 1.00 1 c R . .
 H18 H 0.5567 1.1819 0.3470 0.050 Uiso 1.00 1 c R . .
 H19 H 0.4135 1.1048 0.3362 0.054 Uiso 1.00 1 c R . .
 H20 H 0.4421 1.0067 0.2883 0.040 Uiso 1.00 1 c R . .
 H21 H 0.6450 1.0623 0.0252 0.050 Uiso 1.00 1 c R . .
 H22 H 0.5567 1.1603 -0.0021 0.068 Uiso 1.00 1 c R . .
 H23 H 0.4431 1.2175 0.0602 0.058 Uiso 1.00 1 c R . .
 H24 H 0.4185 1.1761 0.1517 0.057 Uiso 1.00 1 c R . .
 H25 H 0.5057 1.0775 0.1788 0.045 Uiso 1.00 1 c R . .
 H26 H 0.7604 0.8525 0.0796 0.058 Uiso 1.00 1 c R . .
 H27 H 0.7010 0.7699 0.0181 0.095 Uiso 1.00 1 c R . .
 H28 H 0.5254 0.7763 -0.0235 0.124 Uiso 1.00 1 c R . .
 H29 H 0.4075 0.8659 -0.0042 0.134 Uiso 1.00 1 c R . .
 H30 H 0.4702 0.9499 0.0554 0.092 Uiso 1.00 1 c R . .
 H31 H 1.0565 0.9015 0.1180 0.062 Uiso 1.00 1 c R . .
 H32 H 1.1273 0.8365 0.0435 0.093 Uiso 1.00 1 c R . .
 H33 H 1.0454 0.8453 -0.0472 0.099 Uiso 1.00 1 c R . .
 H34 H 0.9078 0.9238 -0.0646 0.076 Uiso 1.00 1 c R . .
 H35 H 0.8363 0.9869 0.0100 0.045 Uiso 1.00 1 c R . .
 H36 H 0.9828 1.0842 0.0436 0.028 Uiso 1.00 1 c R . .
 H37 H 1.0038 1.1966 0.0240 0.036 Uiso 1.00 1 c R . .
 H38 H 0.9112 1.2755 0.0793 0.039 Uiso 1.00 1 c R . .
 H39 H 0.7924 1.2413 0.1527 0.039 Uiso 1.00 1 c R . .
 H40 H 0.7770 1.1285 0.1739 0.031 Uiso 1.00 1 c R . .
 H41 H 1.2522 0.9910 0.2502 0.056 Uiso 1.00 1 c R . .
 H42 H 1.2687 1.0691 0.2593 0.056 Uiso 1.00 1 c R . .
 H43 H 1.1347 1.0716 0.3299 0.060 Uiso 1.00 1 c R . .
 H44 H 1.2168 1.0113 0.3448 0.060 Uiso 1.00 1 c R . .
 H45 H 1.0556 1.1550 0.1758 0.062 Uiso 1.00 1 c R . .
 H46 H 1.1538 1.1593 0.2218 0.062 Uiso 1.00 1 c R . .
 H47 H 1.0271 1.1476 0.2417 0.062 Uiso 1.00 1 c R . .
 H48 H 1.2427 1.0085 0.1471 0.059 Uiso 1.00 1 c R . .
 H49 H 1.2093 1.0822 0.1290 0.059 Uiso 1.00 1 c R . .
 H50 H 1.1300 1.0215 0.1121 0.059 Uiso 1.00 1 c R . .
 H51 H 0.9782 1.0377 0.3892 0.075 Uiso 1.00 1 c R . .
 H52 H 0.9926 0.9633 0.4113 0.075 Uiso 1.00 1 c R . .
 H53 H 0.8850 0.9833 0.3746 0.075 Uiso 1.00 1 c R . .
 H54 H 1.0471 0.8623 0.3490 0.057 Uiso 1.00 1 c R . .
 H55 H 1.1665 0.8973 0.3568 0.057 Uiso 1.00 1 c R . .
 H56 H 1.1292 0.8705 0.2959 0.057 Uiso 1.00 1 c R . .
 H57 H 0.6296 0.5065 0.0781 0.088 Uiso 1.00 1 c R . .
 H58 H 0.7913 0.3566 -0.0074 0.084 Uiso 1.00 1 c R . .
 H59 H 0.6818 0.2839 0.0437 0.086 Uiso 1.00 1 c R . .
 H60 H 0.5627 0.3167 0.1106 0.104 Uiso 1.00 1 c R . .
 H61 H 0.5350 0.4264 0.1258 0.118 Uiso 1.00 1 c R . .
 H62 H 0.7370 0.5063 -0.0338 0.267 Uiso 1.00 1 c R . .
 H63 H 0.8531 0.4767 -0.0113 0.267 Uiso 1.00 1 c R . .
 H64 H 0.7881 0.5315 0.0250 0.267 Uiso 1.00 1 c R . .


loop_
_atom_site_aniso_label
_atom_site_aniso_U_11
_atom_site_aniso_U_22
_atom_site_aniso_U_33
_atom_site_aniso_U_12
_atom_site_aniso_U_13
_atom_site_aniso_U_23
 Pt1 0.01959(7) 0.01951(6) 0.02186(6) -0.00020(7) -0.00291(6) 0.00295(6)
 Ge1 0.0229(2) 0.0194(2) 0.02000(18) 0.00060(18) 0.00047(17) 0.00210(16)
 Ge2 0.0215(2) 0.0232(2) 0.0262(2) -0.00051(18) -0.00084(18) 0.00270(18)
 Ge3 0.0265(2) 0.0238(2) 0.02241(19) -0.0024(2) -0.00589(16) 0.00252(19)
 Ge4 0.0240(2) 0.0213(2) 0.01758(18) 0.00033(17) 0.00070(16) 0.00114(15)
 P1 0.0239(6) 0.0321(6) 0.0444(6) -0.0080(5) -0.0069(5) 0.0153(5)
 P2 0.0308(5) 0.0371(6) 0.0288(5) -0.0058(6) -0.0121(5) 0.0079(4)
 C1 0.038(2) 0.0184(19) 0.0238(19) 0.0007(18) 0.0033(18) 0.0012(15)
 C2 0.058(3) 0.034(2) 0.040(2) -0.001(2) 0.003(2) -0.005(2)
 C3 0.085(4) 0.031(2) 0.051(3) -0.011(2) -0.001(3) -0.011(2)
 C4 0.098(4) 0.024(2) 0.041(2) 0.003(2) 0.025(3) -0.004(2)
 C5 0.068(3) 0.040(3) 0.069(3) 0.009(2) 0.032(3) -0.008(2)
 C6 0.050(2) 0.032(2) 0.050(2) 0.011(2) 0.010(2) -0.004(2)
 C7 0.023(2) 0.027(2) 0.0204(18) -0.0055(17) -0.0022(16) 0.0050(16)
 C8 0.026(2) 0.028(2) 0.031(2) -0.0006(19) 0.0038(18) 0.0023(17)
 C9 0.036(2) 0.031(2) 0.042(2) -0.003(2) -0.003(2) 0.015(2)
 C10 0.032(2) 0.046(2) 0.026(2) -0.009(2) -0.0007(19) 0.013(2)
 C11 0.030(2) 0.052(3) 0.024(2) 0.001(2) 0.0038(19) -0.003(2)
 C12 0.034(2) 0.025(2) 0.033(2) 0.0080(19) 0.0015(19) 0.0051(18)
 C13 0.0194(19) 0.029(2) 0.041(2) -0.0042(16) 0.0011(19) 0.003(2)
 C14 0.031(2) 0.040(2) 0.065(3) -0.008(2) -0.013(2) 0.012(2)
 C15 0.034(2) 0.062(3) 0.078(4) -0.010(2) -0.015(2) 0.004(3)
 C16 0.030(2) 0.034(2) 0.074(3) -0.011(2) 0.009(2) -0.007(2)
 C17 0.046(2) 0.041(2) 0.056(3) -0.013(2) 0.008(2) 0.006(2)
 C18 0.029(2) 0.039(2) 0.038(2) -0.0078(19) 0.0009(19) 0.002(2)
 C19 0.030(2) 0.0224(17) 0.0250(17) 0.0028(18) -0.0024(16) 0.0053(19)
 C20 0.037(2) 0.035(2) 0.033(2) 0.003(2) 0.002(2) 0.0023(19)
 C21 0.058(3) 0.032(2) 0.039(2) -0.005(2) 0.002(2) -0.002(2)
 C22 0.052(3) 0.034(2) 0.038(2) 0.007(2) 0.004(2) -0.004(2)
 C23 0.042(3) 0.054(3) 0.038(2) 0.013(2) 0.002(2) -0.004(2)
 C24 0.030(2) 0.039(2) 0.030(2) 0.0021(19) -0.0003(17) 0.0007(18)
 C25 0.026(2) 0.026(2) 0.034(2) -0.0034(18) -0.0102(18) 0.0029(18)
 C26 0.037(2) 0.049(3) 0.040(2) 0.005(2) -0.002(2) 0.016(2)
 C27 0.047(3) 0.062(3) 0.061(3) 0.007(3) -0.003(3) 0.040(2)
 C28 0.038(3) 0.036(2) 0.070(3) 0.003(2) -0.012(2) 0.016(2)
 C29 0.043(2) 0.039(2) 0.061(3) 0.009(2) -0.009(2) -0.002(2)
 C30 0.033(2) 0.042(2) 0.037(2) -0.004(2) -0.0064(19) 0.010(2)
 C31 0.059(3) 0.036(2) 0.027(2) -0.011(2) -0.009(2) 0.0029(19)
 C32 0.068(3) 0.035(2) 0.042(2) 0.001(2) -0.009(2) -0.005(2)
 C33 0.138(6) 0.036(3) 0.063(4) 0.006(3) -0.031(4) -0.018(2)
 C34 0.162(7) 0.058(4) 0.090(5) -0.000(5) -0.079(5) -0.026(3)
 C35 0.133(6) 0.074(4) 0.128(6) 0.029(4) -0.090(5) -0.056(4)
 C36 0.087(4) 0.062(3) 0.081(4) 0.007(3) -0.048(3) -0.024(3)
 C37 0.043(2) 0.023(2) 0.025(2) 0.003(2) 0.0094(19) 0.0001(16)
 C38 0.075(3) 0.039(2) 0.041(2) 0.024(2) 0.011(2) 0.001(2)
 C39 0.110(5) 0.063(3) 0.061(4) 0.049(3) 0.027(3) 0.006(3)
 C40 0.137(6) 0.062(3) 0.048(3) 0.031(4) 0.031(3) -0.014(3)
 C41 0.109(5) 0.050(3) 0.030(2) 0.004(3) 0.019(3) -0.010(2)
 C42 0.059(3) 0.029(2) 0.025(2) 0.003(2) 0.009(2) -0.0014(17)
 C43 0.025(2) 0.0208(19) 0.0173(17) 0.0009(17) -0.0018(15) 0.0033(14)
 C44 0.023(2) 0.0244(19) 0.0234(19) 0.0012(18) -0.0001(17) -0.0010(15)
 C45 0.030(2) 0.035(2) 0.026(2) -0.008(2) -0.001(2) 0.0053(17)
 C46 0.044(2) 0.022(2) 0.033(2) -0.008(2) -0.008(2) 0.0050(17)
 C47 0.038(2) 0.027(2) 0.033(2) 0.003(2) -0.000(2) -0.0043(18)
 C48 0.029(2) 0.026(2) 0.0206(19) -0.0057(18) 0.0026(17) 0.0011(16)
 C49 0.028(2) 0.051(3) 0.062(3) -0.011(2) -0.021(2) 0.023(2)
 C50 0.050(3) 0.036(2) 0.064(3) -0.010(2) -0.029(2) 0.008(2)
 C51 0.050(3) 0.032(2) 0.072(3) -0.012(2) -0.026(2) 0.012(2)
 C52 0.025(2) 0.068(3) 0.054(3) -0.008(2) 0.000(2) 0.024(2)
 C53 0.059(3) 0.093(4) 0.035(2) -0.008(3) -0.011(2) -0.019(2)
 C54 0.044(2) 0.033(2) 0.064(3) -0.009(2) -0.022(2) 0.028(2)
 C55 0.057(4) 0.074(4) 0.088(5) -0.001(3) -0.032(3) -0.013(3)
 C56 0.074(5) 0.141(7) 0.056(4) -0.050(5) -0.045(3) 0.042(4)
 C57 0.050(3) 0.122(6) 0.040(3) 0.015(4) -0.010(2) -0.017(3)
 C58 0.061(4) 0.087(5) 0.066(4) 0.025(3) -0.024(3) -0.021(3)
 C59 0.079(5) 0.127(7) 0.054(4) -0.018(5) -0.015(3) -0.020(4)
 C60 0.062(4) 0.123(7) 0.109(6) 0.016(5) -0.030(4) -0.057(5)
 C61 0.124(6) 0.438(16) 0.105(6) -0.130(9) -0.084(5) 0.150(9)

#==============================================================================

_computing_data_collection            'CrystalClear'
_computing_cell_refinement            'CrystalClear'
_computing_data_reduction             'CrystalStructure'
_computing_structure_solution         'SHELXS97'
_computing_structure_refinement       'SHELXL'
_computing_publication_material       'CrystalStructure 3.8'
_computing_molecular_graphics          ?

#==============================================================================

# MOLECULAR GEOMETRY

_geom_special_details
;
    ENTER SPECIAL DETAILS OF THE MOLECULAR GEOMETRY
;

loop_
_geom_bond_atom_site_label_1
_geom_bond_atom_site_label_2
_geom_bond_distance
_geom_bond_publ_flag
_geom_bond_site_symmetry_1
_geom_bond_site_symmetry_2
Pt1 Ge1 2.4643(4) yes . .
Pt1 Ge4 2.4769(4) yes . .
Pt1 P1 2.2853(11) yes . .
Pt1 P2 2.2850(10) yes . .
Ge1 Ge2 2.4251(5) yes . .
Ge1 C1 1.990(3) yes . .
Ge1 C7 1.991(3) yes . .
Ge2 Ge3 2.4174(5) yes . .
Ge2 C13 1.962(3) yes . .
Ge2 C19 1.973(3) yes . .
Ge3 Ge4 2.4646(5) yes . .
Ge3 C25 1.968(4) yes . .
Ge3 C31 1.948(4) yes . .
Ge4 C37 1.963(3) yes . .
Ge4 C43 1.986(3) yes . .
P1 C49 1.835(4) yes . .
P1 C51 1.815(4) yes . .
P1 C52 1.820(4) yes . .
P2 C50 1.842(4) yes . .
P2 C53 1.823(4) yes . .
P2 C54 1.795(4) yes . .
C1 C2 1.383(6) yes . .
C1 C6 1.371(6) yes . .
C2 C3 1.416(6) yes . .
C3 C4 1.347(8) yes . .
C4 C5 1.363(7) yes . .
C5 C6 1.393(6) yes . .
C7 C8 1.378(5) yes . .
C7 C12 1.392(5) yes . .
C8 C9 1.400(5) yes . .
C9 C10 1.366(5) yes . .
C10 C11 1.399(6) yes . .
C11 C12 1.384(5) yes . .
C13 C14 1.375(5) yes . .
C13 C18 1.385(5) yes . .
C14 C15 1.404(6) yes . .
C15 C16 1.376(7) yes . .
C16 C17 1.362(6) yes . .
C17 C18 1.380(6) yes . .
C19 C20 1.409(5) yes . .
C19 C24 1.380(5) yes . .
C20 C21 1.393(5) yes . .
C21 C22 1.378(6) yes . .
C22 C23 1.373(6) yes . .
C23 C24 1.381(6) yes . .
C25 C26 1.384(6) yes . .
C25 C30 1.361(5) yes . .
C26 C27 1.399(6) yes . .
C27 C28 1.357(7) yes . .
C28 C29 1.376(7) yes . .
C29 C30 1.401(6) yes . .
C31 C32 1.370(6) yes . .
C31 C36 1.415(7) yes . .
C32 C33 1.389(7) yes . .
C33 C34 1.369(10) yes . .
C34 C35 1.383(9) yes . .
C35 C36 1.384(9) yes . .
C37 C38 1.385(6) yes . .
C37 C42 1.413(5) yes . .
C38 C39 1.405(7) yes . .
C39 C40 1.407(8) yes . .
C40 C41 1.371(8) yes . .
C41 C42 1.393(6) yes . .
C43 C44 1.393(5) yes . .
C43 C48 1.389(5) yes . .
C44 C45 1.389(5) yes . .
C45 C46 1.388(5) yes . .
C46 C47 1.387(5) yes . .
C47 C48 1.396(5) yes . .
C49 C50 1.504(6) yes . .
C55 C56 1.393(9) yes . .
C55 C60 1.345(10) yes . .
C56 C57 1.464(12) yes . .
C56 C61 1.395(12) yes . .
C57 C58 1.367(9) yes . .
C58 C59 1.296(9) yes . .
C59 C60 1.340(11) yes . .
C2 H1 0.950 no . .
C3 H2 0.950 no . .
C4 H3 0.950 no . .
C5 H4 0.950 no . .
C6 H5 0.950 no . .
C8 H6 0.950 no . .
C9 H7 0.950 no . .
C10 H8 0.950 no . .
C11 H9 0.950 no . .
C12 H10 0.950 no . .
C14 H11 0.950 no . .
C15 H12 0.950 no . .
C16 H13 0.950 no . .
C17 H14 0.950 no . .
C18 H15 0.950 no . .
C20 H16 0.950 no . .
C21 H17 0.950 no . .
C22 H18 0.950 no . .
C23 H19 0.950 no . .
C24 H20 0.950 no . .
C26 H21 0.950 no . .
C27 H22 0.950 no . .
C28 H23 0.950 no . .
C29 H24 0.950 no . .
C30 H25 0.950 no . .
C32 H26 0.950 no . .
C33 H27 0.950 no . .
C34 H28 0.950 no . .
C35 H29 0.950 no . .
C36 H30 0.950 no . .
C38 H31 0.950 no . .
C39 H32 0.950 no . .
C40 H33 0.950 no . .
C41 H34 0.950 no . .
C42 H35 0.950 no . .
C44 H36 0.950 no . .
C45 H37 0.950 no . .
C46 H38 0.950 no . .
C47 H39 0.950 no . .
C48 H40 0.950 no . .
C49 H41 0.990 no . .
C49 H42 0.990 no . .
C50 H43 0.990 no . .
C50 H44 0.990 no . .
C51 H45 0.980 no . .
C51 H46 0.980 no . .
C51 H47 0.980 no . .
C52 H48 0.980 no . .
C52 H49 0.980 no . .
C52 H50 0.980 no . .
C53 H51 0.980 no . .
C53 H52 0.980 no . .
C53 H53 0.980 no . .
C54 H54 0.980 no . .
C54 H55 0.980 no . .
C54 H56 0.980 no . .
C55 H57 0.950 no . .
C57 H58 0.950 no . .
C58 H59 0.950 no . .
C59 H60 0.950 no . .
C60 H61 0.950 no . .
C61 H62 0.980 no . .
C61 H63 0.980 no . .
C61 H64 0.980 no . .

loop_
_geom_angle_atom_site_label_1
_geom_angle_atom_site_label_2
_geom_angle_atom_site_label_3
_geom_angle
_geom_angle_publ_flag
_geom_angle_site_symmetry_1
_geom_angle_site_symmetry_2
_geom_angle_site_symmetry_3
Ge1 Pt1 Ge4 89.756(12) yes . . .
Ge1 Pt1 P1 174.05(3) yes . . .
Ge1 Pt1 P2 93.73(3) yes . . .
Ge4 Pt1 P1 90.99(3) yes . . .
Ge4 Pt1 P2 176.26(3) yes . . .
P1 Pt1 P2 85.68(4) yes . . .
Pt1 Ge1 Ge2 108.914(18) yes . . .
Pt1 Ge1 C1 108.37(11) yes . . .
Pt1 Ge1 C7 122.34(11) yes . . .
Ge2 Ge1 C1 110.13(11) yes . . .
Ge2 Ge1 C7 103.14(11) yes . . .
C1 Ge1 C7 103.51(15) yes . . .
Ge1 Ge2 Ge3 101.249(18) yes . . .
Ge1 Ge2 C13 119.20(11) yes . . .
Ge1 Ge2 C19 106.01(10) yes . . .
Ge3 Ge2 C13 112.96(13) yes . . .
Ge3 Ge2 C19 107.40(10) yes . . .
C13 Ge2 C19 109.17(15) yes . . .
Ge2 Ge3 Ge4 99.786(18) yes . . .
Ge2 Ge3 C25 114.10(11) yes . . .
Ge2 Ge3 C31 109.11(13) yes . . .
Ge4 Ge3 C25 112.13(11) yes . . .
Ge4 Ge3 C31 115.43(14) yes . . .
C25 Ge3 C31 106.43(18) yes . . .
Pt1 Ge4 Ge3 116.341(17) yes . . .
Pt1 Ge4 C37 115.06(12) yes . . .
Pt1 Ge4 C43 111.77(9) yes . . .
Ge3 Ge4 C37 105.36(12) yes . . .
Ge3 Ge4 C43 101.62(10) yes . . .
C37 Ge4 C43 105.29(14) yes . . .
Pt1 P1 C49 106.57(14) yes . . .
Pt1 P1 C51 118.55(15) yes . . .
Pt1 P1 C52 120.89(15) yes . . .
C49 P1 C51 103.4(2) yes . . .
C49 P1 C52 101.32(19) yes . . .
C51 P1 C52 103.5(2) yes . . .
Pt1 P2 C50 107.50(15) yes . . .
Pt1 P2 C53 120.55(15) yes . . .
Pt1 P2 C54 116.97(15) yes . . .
C50 P2 C53 102.3(2) yes . . .
C50 P2 C54 103.5(2) yes . . .
C53 P2 C54 103.8(2) yes . . .
Ge1 C1 C2 122.5(3) yes . . .
Ge1 C1 C6 119.1(3) yes . . .
C2 C1 C6 118.3(3) yes . . .
C1 C2 C3 120.0(4) yes . . .
C2 C3 C4 120.5(4) yes . . .
C3 C4 C5 119.7(4) yes . . .
C4 C5 C6 120.6(4) yes . . .
C1 C6 C5 120.9(4) yes . . .
Ge1 C7 C8 120.9(2) yes . . .
Ge1 C7 C12 121.6(2) yes . . .
C8 C7 C12 117.3(3) yes . . .
C7 C8 C9 121.2(3) yes . . .
C8 C9 C10 120.8(3) yes . . .
C9 C10 C11 119.1(3) yes . . .
C10 C11 C12 119.4(3) yes . . .
C7 C12 C11 122.2(3) yes . . .
Ge2 C13 C14 120.2(3) yes . . .
Ge2 C13 C18 123.0(2) yes . . .
C14 C13 C18 116.7(3) yes . . .
C13 C14 C15 121.8(4) yes . . .
C14 C15 C16 119.0(4) yes . . .
C15 C16 C17 120.4(4) yes . . .
C16 C17 C18 119.6(4) yes . . .
C13 C18 C17 122.5(3) yes . . .
Ge2 C19 C20 120.3(2) yes . . .
Ge2 C19 C24 122.2(2) yes . . .
C20 C19 C24 117.5(3) yes . . .
C19 C20 C21 120.1(3) yes . . .
C20 C21 C22 121.5(4) yes . . .
C21 C22 C23 117.8(4) yes . . .
C22 C23 C24 121.9(4) yes . . .
C19 C24 C23 121.1(3) yes . . .
Ge3 C25 C26 119.0(3) yes . . .
Ge3 C25 C30 123.5(3) yes . . .
C26 C25 C30 117.5(3) yes . . .
C25 C26 C27 120.8(4) yes . . .
C26 C27 C28 121.3(4) yes . . .
C27 C28 C29 118.4(4) yes . . .
C28 C29 C30 120.3(4) yes . . .
C25 C30 C29 121.8(4) yes . . .
Ge3 C31 C32 123.8(3) yes . . .
Ge3 C31 C36 119.6(3) yes . . .
C32 C31 C36 116.5(4) yes . . .
C31 C32 C33 122.4(5) yes . . .
C32 C33 C34 119.7(5) yes . . .
C33 C34 C35 120.6(5) yes . . .
C34 C35 C36 118.8(6) yes . . .
C31 C36 C35 122.0(5) yes . . .
Ge4 C37 C38 122.0(3) yes . . .
Ge4 C37 C42 120.0(3) yes . . .
C38 C37 C42 117.8(3) yes . . .
C37 C38 C39 121.5(4) yes . . .
C38 C39 C40 118.8(5) yes . . .
C39 C40 C41 120.8(5) yes . . .
C40 C41 C42 119.6(4) yes . . .
C37 C42 C41 121.4(4) yes . . .
Ge4 C43 C44 122.5(2) yes . . .
Ge4 C43 C48 119.3(2) yes . . .
C44 C43 C48 118.2(3) yes . . .
C43 C44 C45 120.9(3) yes . . .
C44 C45 C46 120.1(3) yes . . .
C45 C46 C47 120.0(3) yes . . .
C46 C47 C48 119.2(3) yes . . .
C43 C48 C47 121.6(3) yes . . .
P1 C49 C50 109.1(2) yes . . .
P2 C50 C49 110.3(3) yes . . .
C56 C55 C60 119.0(7) yes . . .
C55 C56 C57 116.8(6) yes . . .
C55 C56 C61 118.8(8) yes . . .
C57 C56 C61 124.4(6) yes . . .
C56 C57 C58 117.2(5) yes . . .
C57 C58 C59 124.2(7) yes . . .
C58 C59 C60 118.6(7) yes . . .
C55 C60 C59 124.1(6) yes . . .
C1 C2 H1 120.0 no . . .
C3 C2 H1 120.0 no . . .
C2 C3 H2 119.8 no . . .
C4 C3 H2 119.8 no . . .
C3 C4 H3 120.1 no . . .
C5 C4 H3 120.2 no . . .
C4 C5 H4 119.7 no . . .
C6 C5 H4 119.7 no . . .
C1 C6 H5 119.6 no . . .
C5 C6 H5 119.6 no . . .
C7 C8 H6 119.4 no . . .
C9 C8 H6 119.4 no . . .
C8 C9 H7 119.6 no . . .
C10 C9 H7 119.6 no . . .
C9 C10 H8 120.4 no . . .
C11 C10 H8 120.4 no . . .
C10 C11 H9 120.3 no . . .
C12 C11 H9 120.3 no . . .
C7 C12 H10 118.9 no . . .
C11 C12 H10 118.9 no . . .
C13 C14 H11 119.1 no . . .
C15 C14 H11 119.1 no . . .
C14 C15 H12 120.5 no . . .
C16 C15 H12 120.5 no . . .
C15 C16 H13 119.8 no . . .
C17 C16 H13 119.8 no . . .
C16 C17 H14 120.2 no . . .
C18 C17 H14 120.2 no . . .
C13 C18 H15 118.8 no . . .
C17 C18 H15 118.7 no . . .
C19 C20 H16 119.9 no . . .
C21 C20 H16 120.0 no . . .
C20 C21 H17 119.3 no . . .
C22 C21 H17 119.3 no . . .
C21 C22 H18 121.1 no . . .
C23 C22 H18 121.1 no . . .
C22 C23 H19 119.1 no . . .
C24 C23 H19 119.1 no . . .
C19 C24 H20 119.4 no . . .
C23 C24 H20 119.4 no . . .
C25 C26 H21 119.6 no . . .
C27 C26 H21 119.6 no . . .
C26 C27 H22 119.4 no . . .
C28 C27 H22 119.4 no . . .
C27 C28 H23 120.8 no . . .
C29 C28 H23 120.8 no . . .
C28 C29 H24 119.9 no . . .
C30 C29 H24 119.9 no . . .
C25 C30 H25 119.1 no . . .
C29 C30 H25 119.1 no . . .
C31 C32 H26 118.8 no . . .
C33 C32 H26 118.8 no . . .
C32 C33 H27 120.2 no . . .
C34 C33 H27 120.2 no . . .
C33 C34 H28 119.7 no . . .
C35 C34 H28 119.7 no . . .
C34 C35 H29 120.6 no . . .
C36 C35 H29 120.6 no . . .
C31 C36 H30 119.0 no . . .
C35 C36 H30 119.0 no . . .
C37 C38 H31 119.2 no . . .
C39 C38 H31 119.2 no . . .
C38 C39 H32 120.6 no . . .
C40 C39 H32 120.6 no . . .
C39 C40 H33 119.6 no . . .
C41 C40 H33 119.6 no . . .
C40 C41 H34 120.2 no . . .
C42 C41 H34 120.2 no . . .
C37 C42 H35 119.3 no . . .
C41 C42 H35 119.3 no . . .
C43 C44 H36 119.6 no . . .
C45 C44 H36 119.5 no . . .
C44 C45 H37 119.9 no . . .
C46 C45 H37 120.0 no . . .
C45 C46 H38 120.0 no . . .
C47 C46 H38 120.0 no . . .
C46 C47 H39 120.4 no . . .
C48 C47 H39 120.4 no . . .
C43 C48 H40 119.2 no . . .
C47 C48 H40 119.2 no . . .
P1 C49 H41 109.9 no . . .
P1 C49 H42 109.9 no . . .
C50 C49 H41 109.9 no . . .
C50 C49 H42 109.9 no . . .
H41 C49 H42 108.3 no . . .
P2 C50 H43 109.6 no . . .
P2 C50 H44 109.6 no . . .
C49 C50 H43 109.6 no . . .
C49 C50 H44 109.6 no . . .
H43 C50 H44 108.1 no . . .
P1 C51 H45 109.5 no . . .
P1 C51 H46 109.5 no . . .
P1 C51 H47 109.5 no . . .
H45 C51 H46 109.5 no . . .
H45 C51 H47 109.5 no . . .
H46 C51 H47 109.5 no . . .
P1 C52 H48 109.5 no . . .
P1 C52 H49 109.5 no . . .
P1 C52 H50 109.5 no . . .
H48 C52 H49 109.5 no . . .
H48 C52 H50 109.5 no . . .
H49 C52 H50 109.5 no . . .
P2 C53 H51 109.5 no . . .
P2 C53 H52 109.5 no . . .
P2 C53 H53 109.5 no . . .
H51 C53 H52 109.5 no . . .
H51 C53 H53 109.5 no . . .
H52 C53 H53 109.5 no . . .
P2 C54 H54 109.5 no . . .
P2 C54 H55 109.5 no . . .
P2 C54 H56 109.5 no . . .
H54 C54 H55 109.5 no . . .
H54 C54 H56 109.5 no . . .
H55 C54 H56 109.5 no . . .
C56 C55 H57 120.5 no . . .
C60 C55 H57 120.5 no . . .
C56 C57 H58 121.4 no . . .
C58 C57 H58 121.4 no . . .
C57 C58 H59 117.9 no . . .
C59 C58 H59 117.9 no . . .
C58 C59 H60 120.7 no . . .
C60 C59 H60 120.7 no . . .
C55 C60 H61 117.9 no . . .
C59 C60 H61 117.9 no . . .
C56 C61 H62 109.5 no . . .
C56 C61 H63 109.5 no . . .
C56 C61 H64 109.5 no . . .
H62 C61 H63 109.5 no . . .
H62 C61 H64 109.5 no . . .
H63 C61 H64 109.5 no . . .


#==============================================================================

# Additional structures and associated data_? identifiers
# should be added at this point if there is more than one 
# structure analysis in the CIF.

#==============================================================================

#     End of CIF

#==============================================================================
